1 **Title: Association of Lung Fibrotic Changes and Cardiological Dysfunction with**  
2 **Hypertension in Long COVID-19 cohort**

3 Authors

4 Ainur Tauekelova<sup>1</sup>, Zhanar Kalila<sup>1</sup>, Bakhtiyar Akerke<sup>1</sup>, Zarina Sautbayeva<sup>2</sup>, Polina Len<sup>2</sup>,  
5 Aliya Sailybayeva<sup>1</sup>, Sadyk Khamitov<sup>1</sup>, Nazira Kadroldinova<sup>3</sup>, Natalie S. Barteneva<sup>\*2,4</sup> and  
6 Makhabbat Bekbossynova<sup>\*1</sup>

7  
8 Affiliations

9 <sup>1</sup>National Research Center for Cardiac Surgery, Nur-Sultan, Kazakhstan

10 <sup>2</sup>School of Sciences and Humanities, Nazarbayev University, Nur-Sultan, Kazakhstan

11 <sup>3</sup>School of Medicine, Nazarbayev University, Nur-Sultan

12 <sup>4</sup>Harvard Medical School, Brigham and Women's Hospital, Boston, MA, United States

13 \*Corresponding author

14  
15 Keywords: LongCOVID-19; post-COVID-19; hypertension; diabetes; ferritin; fibrinogen; lung  
16 sequelae; cardiovascular sequelae; female gender

17  
18 **Abstract**

19 **Background.** Long COVID-19 symptoms appeared in many COVID-19 survivors. However, the  
20 prevalence and symptoms associated with long COVID and its comorbidities have not been  
21 established.

22 **Methods.** Between May and September 2020, we included 312 patients with post-COVID-19  
23 from 21 primary care centers if they had any persistent symptoms for at least three months from  
24 the first onset of the disease. On the 6 months follow up, their lung function was assessed by CT  
25 and spirometry, whereas cardiac function was assessed by electrocardiogram (ECG), Holter  
26 ECG, Echocardiography, and 24-hour blood pressure monitoring. A six-minute test (6MWT)  
27 was conducted on 308 participants during the follow-up visit. All participants were given a  
28 questionnaire with items on demographic information, current complaints, comorbidities, and  
29 medications, and Chalder Fatigue Scale (CFS) questionnaire. Statistical analysis was done using  
30 R vs. 4.1.2. Two-group comparison of continuous variables was performed using a T-test for  
31 normally distributed data, and the Mann-Whitney Wilcoxon test, ANOVA, and Kruskal-Wallis  
32 tests were applied for multiple comparisons following with Tukey and Dunn tests as post-hoc  
33 methods. Hochberg p-value adjustment was used to reduce the false discovery rate during  
34 multiple comparisons. Categorical variables were analyzed with Fisher's Exact test.

35 **Results.** Of 312 persons investigated, there was no significant gender difference between post-  
36 COVID-19 clinical manifestations except for memory dysfunction and anxiety, more prevalent  
37 among female participants. Chalder Fatigue Score  $\geq 4$  was predominant in female participants  
38 (243, 78%). 39 (12.5%) participants reported having type 2 diabetes mellitus, and 158 (50.64%)  
39 had hypertension.

40 Among the tested parameters, those positively correlated with comorbid conditions include age,  
41 BMI, D-dimers, NT-proBNP, C-reactive protein, neutrophils, fasting glucose, and HbA1c;  
42 hypertension also shows three associations that were not found in patients when examining the  
43 role of diabetes: increased hemoglobin, fibrinogen, and ferritin. 24-hour blood pressure  
44 monitoring revealed significantly higher systolic and diastolic blood pressure, left ventricular  
45 hypertrophy, and elevated NT-proBNP in participants with hypertension and subjects with type 2

46 diabetes. Left ventricular diastolic dysfunction is more frequently present in patients with  
47 hypertension.

48 Chest CT was conducted on 227 (72.8%) participants 5.8±0.9 months after the onset of  
49 COVID-19. The most common registered CT abnormality was chronic bronchitis (198, 87.2%),  
50 followed by fibrotic changes in (83, 36.6%) and mediastinal lymphadenopathy (23, 10.1%).

51 Immunological test results showed that SARS-CoV19 IgG antibodies were present in 241  
52 subjects (77.2%), and SARS-CoV19 IgM antibodies were present in 9 subjects (2.88%).

53 **Conclusions.** Our study provides valuable clues for long-term post-sequelae in a cohort of the  
54 Long COVID-19 subjects. We demonstrated a strong association of signs of cardiac dysfunction,  
55 lung fibrotic changes, increased hemoglobin, fibrinogen, and ferritin with hypertension but not  
56 with other comorbidities. Our results are of importance for understanding the Long Covid-19  
57 syndrome.

58

## 59 **Introduction**

60 The COVID-19 disease, resulting from infection with SARS-CoV-2, is highly contagious and  
61 may spread asymptotically or presymptomatically (Furukawa et al., 2020; Rivett et al., 2020;  
62 Buitrago-Garci et al., 2020). There is a growing concern regarding the potential for COVID-19  
63 infection to contribute to a burden of chronic cardiovascular and respiratory symptoms among  
64 recovered individuals (Leth et al., 2021). The SARS-CoV2 virus appears unique among  
65 coronaviruses due to the high rate of transmission and atypical pattern of inflammatory response  
66 leading in severe cases to cytokine storm phenomenon (rev. Tang et al., 2020). Long-COVID-19  
67 or post-COVID-19 syndrome describes symptoms lasting for more than three months after the  
68 first COVID-19 symptoms onset (Yong, 2021), and there is a critical need to evaluate and  
69 understand potential long-term implications of COVID-19. The most frequent symptoms are  
70 shortness of breath and fatigue (Cares-Marambio et al., 2021; Shah et al., 2021; Davido et al.,  
71 2020; Halpin et al., 2020).

72 Many meta-analyses identified that the elderly population with pre-existing disease conditions  
73 such as type 2 diabetes mellitus (Singh et al., 2020; Kumar et al., 2020) and hypertension  
74 (Pranata et al., 2020; de Almeida-Pititto et al., 2021) are found to be at an increased risk of  
75 getting COVID-19 infection and its complications (Deng et al., 2020). COVID-19 has been  
76 linked to multiple extra-respiratory symptoms more prevalent in patients with positive  
77 cardiovascular disease history (Han et al., 2020). Long-lasting alternations in pulmonary  
78 function, including the reduced diffusing capacity of lungs and the restrictive syndrome, were  
79 observed in patients surviving COVID-19 pneumonia during a 6-month and 12 months follow-up  
80 period (Fortini et al., 2021; Fumagalli et al., 2021; Wu et al., 2021; Ordinola Navarro et al.,  
81 2021). However, long COVID affects even mild-to-moderate cases of survivors of COVID-19  
82 with pulmonary sequelae reported after recovery (Wang et al., 2020).

83 In this paper, we report results from a prospective cohort study of 312 patients with COVID-19  
84 onset between May and September 2020. We are aimed to determine the prevalence and extent  
85 of allowing analysis of persisting Long COVID-19 symptoms over 6 months duration  
86 emphasizing the patient's cardiovascular and lung sequelae of COVID-19.

87

## 88 2. Materials and Methods

### 89 2.1 Study design and participants.

90 This is a prospective cohort study that was based on a pilot project of the post-COVID center  
91 in JSC "National Research Cardiac Surgery Center" in Nur-Sultan, Kazakhstan. The study was  
92 conducted in December 2020. The post-COVID center was established according to the order of  
93 the Ministry of Health of the Republic of Kazakhstan No. 763 dated November 24, 2020, as a  
94 pilot project for the improvement of the coronavirus infection situation in the healthcare of the  
95 country. Participants were referred from the primary care centers of Nur-Sultan (Kazakhstan) to  
96 the post-COVID center. Participants were selected if they had any persistent symptoms for at  
97 least three months from the first onset of the disease. Selected 312 were referred to the follow-up  
98 visit to JSC "National Research Cardiac Surgery Center." All participants had confirmed  
99 infection with positive PCR during the active infection or laboratory immunohistochemical  
100 results. The study was ethically approved according to the order of the Ministry of Health of the  
101 Republic of Kazakhstan, and informed consent was taken in the primary care centers.

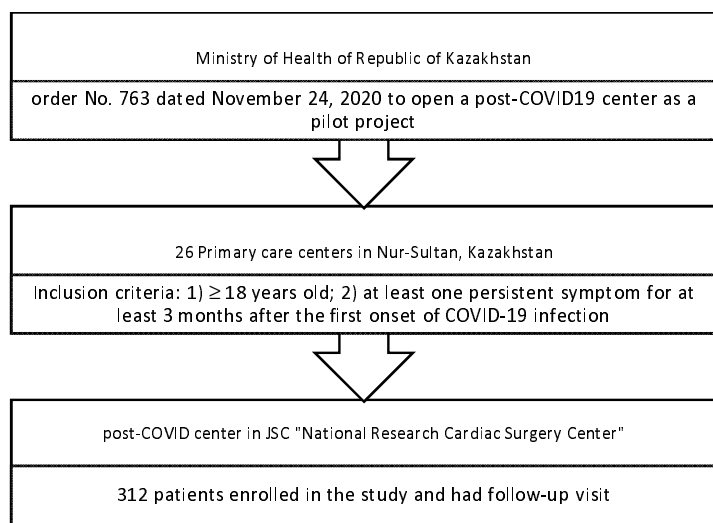

102

103 **Figure 1.** Study flow diagram.

### 104 2.2 Clinical Assessment

105 All participants were given a questionnaire with items on demographic information, current  
106 complaints, comorbidities, and medications (**Appendix 1**). All participants were given Chalder  
107 Fatigue Scale (CFS) questionnaire (**Appendix 2**) for completion. Vital signs of participants,  
108 including blood pressure and heart rate were performed by one of three physicians participating  
109 in data collection. Venous blood samples were collected from all participants for complete blood  
110 count, including hemoglobin, white blood cells, lymphocytes, neutrophils, and platelet count, for  
111 biochemistry panel, including serum creatinine, blood urea, total cholesterol, glucose, and ALT,  
112 for coagulation profile, including fibrinogen and D-Dimer (DD), and for glycohemoglobin A<sub>1c</sub>  
113 (HbA<sub>1c</sub>), C-reactive protein, ferritin, vitamin B12, vitamin 25(OH)D, and NT-proBNP. For  
114 coagulation tests AVATUBE R with sodium citrate was used, and Sysmex CS-2500 instrument

115 (Sysmex, Japan). Blood for DD was collected in AVATUBE R with sodium citrate, and D-  
116 dimers quantification was performed with Cobas R 6000. Additionally, blood analysis for  
117 immunological tests was performed, including SARS-CoV-2 IgG, SARS-CoV-2 IgM, CMV  
118 IgG, and CMV IgM antibodies quantified by ELISA. All participants were proposed chest CT,  
119 but 85 participants (28.3%) refused due to personal claims. Cardiac function was assessed by  
120 electrocardiogram (ECG), Holter ECG, Echocardiography, and 24-hour blood pressure  
121 monitoring in all participants. A six-minute test (6MWT) was conducted in 308 participants at  
122 the follow-up visit. The medical records of each participant were reviewed independently by  
123 three physicians (cardiologist with more than 10 years of experience) of the hospital. All CT  
124 images were reviewed in random order by one senior cardiothoracic radiologist who were not  
125 aware of any clinical or laboratory findings or participant outcomes. The confirmation of  
126 COVID-19 infection was done by RT-PCR assay on nose/throat swab or sputum samples using  
127 CFX96 R Real-Time System (Bio-Rad Laboratories, Inc., USA).

128

### 129 **2.3 Statistical Analysis**

130 Statistical analysis was performed in parallel using R vs. 4.1.2 (2021-11-01) and GraphPad  
131 Prism vs. 8.4.3 (Dotmatics, USA). Normality was assessed using the Shapiro test. Two-group  
132 comparison of continuous variables was performed using T-test for normally distributed data and  
133 MannWhitney Wilcoxon test if the condition of normality was violated. For multiple  
134 comparisons ANOVA and Kruskal-Wallis tests were applied with Tukey and Dunn tests as post-  
135 hoc methods. Hochberg p-value adjustment was used to reduce the false discovery rate during  
136 multiple comparisons. Categorical variables were analyzed with Fisher's Exact test.

137

### 138 **2.4 Role of funding source**

139 This research has been funded by the Science Committee of the Ministry of Education and  
140 Science of the Republic of Kazakhstan (Grant No. BR10965164). <https://www.ncste.kz/en/main>.  
141 The funders had no role in study design, data collection and analysis, decision to publish, or  
142 preparation of the manuscript.

143

### 144 **2.5 Ethical considerations**

145 All participants of the study provided written informed consent. The study was approved by the  
146 National Research Center Cardiac Surgery Center Ethical Committee (#01-97/2021 from  
147 22/04/21). No compensation was provided to participants (only reimbursing of travelling costs).

## 148 **3. Results**

### 149 **3.1 Cohort description**

150 The comorbidities are reported in **Table 1** from the most prevalent to the least. Overall, 223  
151 participants had at least one comorbidity. The most common comorbidities included  
152 hypertension (154, 50.6%), gastrointestinal (GI) disorders (74, 23.73%), and neurological  
153 disorders (43, 13.78%). Some of the participants also had overlapping of the comorbidities.

154 The proportion of coronary artery disease (CAD) in male participants was higher than in  
155 females, 14.85% in males vs. 7.11% in females,  $P=0.030$ . Meanwhile, endocrine disorders were  
156 more prevalent among female participants (16, 7.58%) vs. 1, 0.99%), respectively,  $P=0.016$ .

157 Respiratory comorbidities include asthma and chronic obstructive disease (COPD) (9, 2.88%)  
158 with no significant difference among female and male participants.

159  
160  
161

**Table 1.** Clinical characteristic and comorbidities in participants after COVID-19 infection.

|                                         | Total<br>(n=312)    | Female<br>(n=211)   | Male<br>(n=101)   | <i>P</i> -value |
|-----------------------------------------|---------------------|---------------------|-------------------|-----------------|
| Age <sup>†</sup> ,<br>years             | 54 (42.5;60)        | 54 (44;60)          | 55 (40;61)        | 0.689           |
| BMI <sup>†</sup> ,<br>kg/m <sup>2</sup> | 26.9<br>(23.4;31.1) | 26.9<br>(23.1;31.6) | 26.7<br>(24;30.4) | 0.531           |
| Obesity class                           |                     |                     |                   |                 |
| Overweight<br>(BMI 25.0–29.9)           | 90 (28.9)           | 57 (27.0)           | 33 (32.7)         | 0.302           |
| Obese<br>(BMI ≥30.0)                    | 103 (33.0)          | 73 (34.6)           | 30 (29.7)         | 0.390           |
| CFS ≥4                                  | 243 (77.9)          | 173 (82.0)          | 70 (69.31)        | 0.012           |
| Hypertension                            | 158 (50.6)          | 112 (53.1)          | 61 (60.4)         | 0.224           |
| GI disorders                            | 74 (23.7)           | 49 (23.2)           | 25 (24.7)         | 0.766           |
| Neurological<br>disorders               | 43 (13.8)           | 31 (14.7)           | 12 (11.9))        | 0.500           |
| Type 2 Diabetes                         | 40 (12.8)           | 27 (12.8)           | 12 (12.9)         | 0.985           |
| CAD                                     | 30 (9.62)           | 15 (7.10)           | 15 (14.9)         | 0.030           |
| Endocrine<br>disorders                  | 17 (5.45)           | 16 (7.58)           | 1 (0.99)          | 0.016           |
| Heart Failure                           | 14 (4.49)           | 8 (3.79)            | 6 (5.94)          | 0.391           |
| UTI disorders                           | 14 (4.49)           | 7 (3.32)            | 7 (6.93)          | 0.149           |
| Rhythm<br>disturbances                  | 6 (1.92)            | 3 (1.42)            | 3 (1.42)          | 0.157           |
| Asthma                                  | 7 (2.24)            | 6 (2.84)            | 1 (0.99)          | 0.301           |
| COPD                                    | 2 (0.64)            | 1 (0.47)            | 1 (0.99)          | 0.593           |

**Note.** Except where indicated, data are numbers of participants, with percentages in parentheses. *P* values comparing female and male participants were determined with the Fisher’s Exact test, independent-samples *t* test, or Mann-Whitney *U* test.

CFS – Chalder Fatigue Score

GI disorders include chronic cholecystitis, pancreatitis, steatohepatitis, and atrophic gastritis

Neurological disorders include encephalopathy of mixed etiology;

endocrine disorders include hypothyroidism.

†Data are medians, with interquartile ranges in parentheses.

162

163 A total of 312 participants who were previously infected with COVID-19 infection were  
 164 included in the study. Mean time for the post-COVID-19 assessment was  $5.8 \pm 0.9$  months onset  
 165 of first symptoms of COVID-19 infection. 111 participants had hospitalization during the active  
 166 COVID-19 infection while 201 participants were treated at home. Clinical characteristics of the  
 167 participants are reported in **Table 1**.

168 Median age of all participants were 54 years (IQR, 17.5) and 211 participants (67.6%) were  
 169 females. One participant required extracorporeal oxygenation membrane oxygenation (ECMO)  
 170 during the active infection. Median age of all participants was 54 years (IQR, 17.5) and 211  
 171 participants (67.6%) were females. Median BMI of all participants was  $26.9 \text{ kg/m}^2$  (IQR, 7.7)  
 172 with 90 participants (28.9%) overweight and 103 participants (33.0%) obese. Chalder Fatigue  
 173 Score  $\geq 4$  was present in 243 participants (78%) with more predominance in female participants.  
 174

### 175 **3.2 Clinical manifestations at the follow-up and laboratory results**

176 Clinical manifestations of participants at the follow-up are reported in **Table 2**. The symptoms  
 177 are presented from the most common to the least. The most common symptoms among 312  
 178 participants were fatigue (220, 70.51%), tiredness (180, 57.69%), and sleep disturbances (168,  
 179 53.85%), muscle pain (109, 34.9%), memory dysfunction (108, 34.9%), dizziness (34.9%),  
 180 headache (79, 25.3%), instability of blood pressure mostly with increased systolic blood pressure  
 181 (62, 19.9%), palpitation (47, 15.1%), dyspnea on exertion (45, 14.4%), joint pain (39, 12.5%),  
 182 and increased sweating (39, 12.5). Overall, there were no significant difference between post-  
 183 COVID-19 clinical manifestations among female and male participants, except memory  
 184 dysfunction and anxiety. Both were more prevalent among female participants, 81 female  
 185 participants (38.4%) reported memory dysfunction (27 male participants (26.7%),  $P=0.043$ ) and  
 186 28 female participants (12.3%) reported anxiety (2 male participants (1.98%),  $P=0.003$ ).

187 **Table 2.** Participants-reported clinical manifestations persistent after COVID-19 infection at  
 188 median of 6 months follow-up.

|                       | Total<br>(n=312) | Female<br>(n=211) | Male<br>(n=101) | <i>P</i> -value |
|-----------------------|------------------|-------------------|-----------------|-----------------|
| Fatigue               | 220 (70.5)       | 143 (67.8)        | 77 (76.2)       | 0.125           |
| Tiredness             | 180 (57.7)       | 118 (55.9)        | 62 (61.5)       | 0.361           |
| sleep<br>disturbances | 168 (53.9)       | 116 (55.0)        | 52 (51.5)       | 0.563           |
| Muscle<br>pain        | 109 (34.9)       | 78 (37.0)         | 31 (30.7)       | 0.277           |

|                         |            |            |           |       |
|-------------------------|------------|------------|-----------|-------|
| memory dysfunction      | 108 (34.6) | 81 (38.4)  | 27 (26.7) | 0.043 |
| dizziness               | 107 (34.3) | 80 (37.9)  | 27 (26.7) | 0.052 |
| headache                | 79 (25.3)  | 59 (28.0)  | 20 (19.8) | 0.121 |
| BP instability          | 62 (19.9)  | 38 (18.0)  | 24 (23.8) | 0.233 |
| Palpitation             | 47 (15.1)  | 34 (16.1)  | 13 (12.9) | 0.454 |
| Dyspnea on exertion     | 45 (14.4)  | 31 (14.7)  | 14 (13.9) | 0.845 |
| joint pain              | 39 (12.5)  | 30 (14.2)  | 9 (8.9)   | 0.185 |
| increased sweating      | 39 (12.5)  | 29 (13.7)  | 10 (9.9)  | 0.337 |
| anxiety                 | 28 (8.97)  | 26 (12.32) | 2 (1.98)  | 0.003 |
| hair loss               | 27 (8.65)  | 19 (9.00)  | 8 (7.92)  | 0.750 |
| Dyspnea on rest         | 18 (5.77)  | 11 (5.21)  | 7 (6.93)  | 0.543 |
| decreased vision        | 18 (5.77)  | 12 (5.69)  | 6 (5.94)  | 0.928 |
| GI symptoms             | 16 (5.13)  | 12 (5.69)  | 4 (3.96)  | 0.518 |
| chest pain in rest      | 12 (3.85)  | 11 (5.21)  | 1 (0.99)  | 0.070 |
| Daytime sleeping        | 11 (3.53)  | 6 (2.84)   | 5 (4.95)  | 0.563 |
| Cough with sputum       | 9 (2.88)   | 7 (3.32)   | 2 (1.98)  | 0.509 |
| mood change             | 8 (2.56)   | 5 (2.37)   | 3 (2.97)  | 0.753 |
| chest pain on exertion  | 7 (2.24)   | 5 (2.37)   | 2 (1.98)  | 0.828 |
| dry cough               | 7 (2.24)   | 7 (3.32)   | 0         | 0.064 |
| numbness in extremity   | 7 (2.24)   | 5 (2.37)   | 2 (1.98)  | 0.828 |
| decreased hearing       | 6 (1.92)   | 6 (2.84)   | 0         | 0.087 |
| tremor in extremity     | 5 (1.60)   | 3 (1.42)   | 2 (1.98)  | 0.713 |
| Impaired sense of smell | 5 (1.60)   | 3 (1.42)   | 2 (1.98)  | 0.713 |
| increased weight        | 4 (1.28)   | 3 (1.42)   | 1 (0.99)  | 0.751 |
| decreased concentration | 3 (0.96)   | 2 (0.95)   | 1 (0.99)  | 0.971 |
| Wheezing                | 2 (0.67)   | 1 (0.47)   | 1 (0.99)  | 0.593 |

|                                                                                                                                                                                                                    |          |          |          |       |
|--------------------------------------------------------------------------------------------------------------------------------------------------------------------------------------------------------------------|----------|----------|----------|-------|
| nervousness                                                                                                                                                                                                        | 2 (0.64) | 2 (0.95) | 0        | 0.326 |
| presyncope                                                                                                                                                                                                         | 2 (0.64) | 2 (0.95) | 0        | 0.326 |
| syncope                                                                                                                                                                                                            | 2 (0.64) | 2 (0.95) | 0        | 0.593 |
| Impaired sense of taste                                                                                                                                                                                            | 2 (0.64) | 1 (0.47) | 1 (0.99) | 0.593 |
| fever                                                                                                                                                                                                              | 2 (0.64) | 1 (0.47) | 1 (0.99) | 0.593 |
| edema of extremities                                                                                                                                                                                               | 2 (0.64) | 2 (0.95) | 0        | 0.326 |
| <p>Note.— Data are numbers of participants, with percentages in parentheses. <i>P</i> values comparing female and male participants were determined with the <math>\chi^2</math> test.<br/>BP – blood pressure</p> |          |          |          |       |

189

190 Out of 312 participants, 148 (47.44%) had neither hypertension nor type 2 diabetes mellitus, 33  
 191 (10.58%) had both hypertension and diabetes, 125 (40.06%) had hypertension only, and 6  
 192 (1.92%) participants had diabetes only. Overall, 39 (12.5%) participants reported having type 2  
 193 diabetes mellitus, and 158 (50.64%) had hypertension. Among the tested parameters, those  
 194 positively correlated with comorbid conditions include age, BMI, D-dimers, NT-proBNP, C-  
 195 reactive protein, neutrophils, fasting glucose, and HbA1c; hypertension also shows three  
 196 associations that were not found in patients when examining the role of diabetes: increased  
 197 hemoglobin, fibrinogen, and ferritin (**Figures 2-4**).

198 Multiple group comparisons had shown that from the parameters highlighted above, older age,  
 199 higher body mass index, increased D-dimers, and NT-proBNP are primarily correlated with  
 200 hypertension rather than diabetes mellitus. On the other hand, higher levels of fasting glucose,  
 201 HbA1c, and C-reactive protein are attributed to having both comorbid states rather than one.  
 202 Neutrophils, white blood cells, NT-pro BNP, hemoglobin, and fibrinogen were not significantly  
 203 different among groups, according to the post-hoc test.

204



205

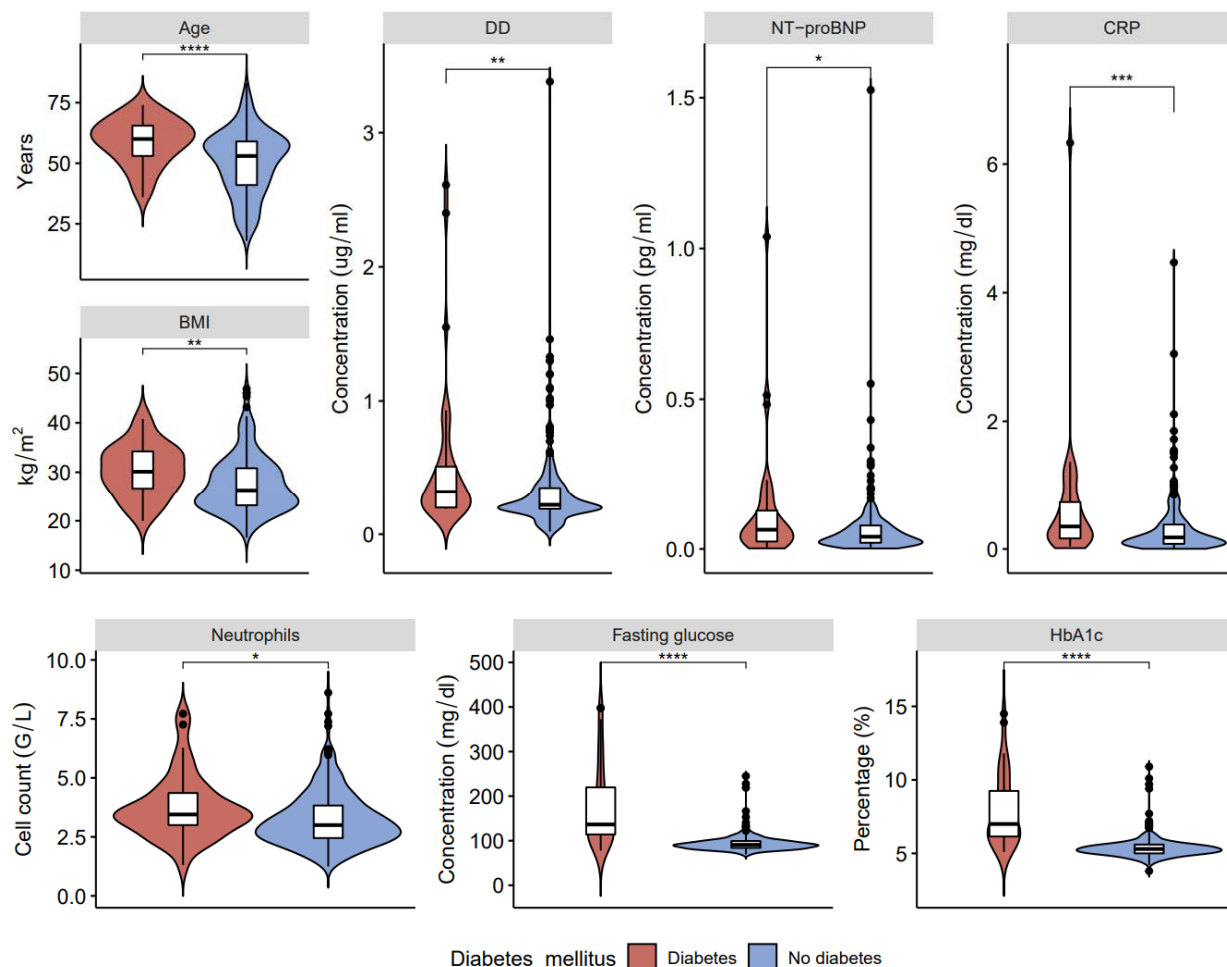

206

207

208 **Figure 2.** Clinical characteristics and laboratory results of blood samples in post-COVID-19

209 patients with and without type 2 diabetes: age, D-dimers (DD), ventricular natriuretic peptide

210 (NT-proBNP), C-reactive protein (CRP), body mass index (BMI), neutrophils, fasting glucose

and glycated hemoglobin (HbA1c) (\* $p < 0.05$ , \*\* $p < 0.01$ , \*\*\* $p < 0.001$ , \*\*\*\* $p < 0.0001$ ).

211

212

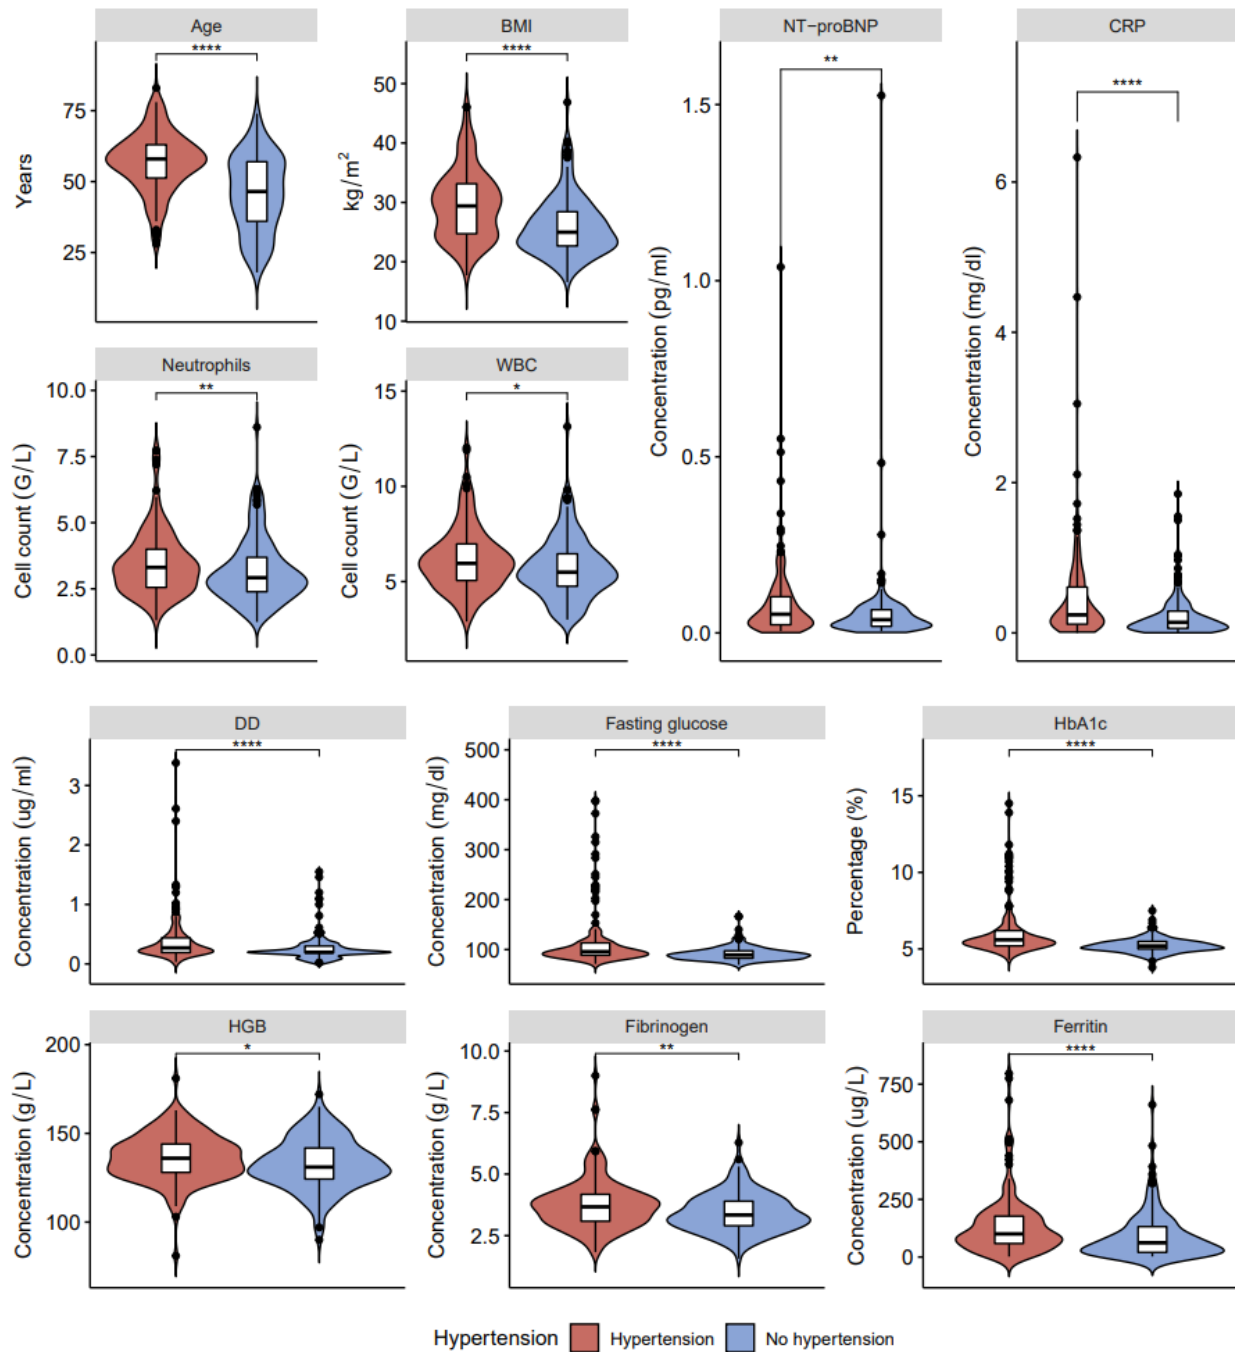

213  
214

215 **Figure 3.** Clinical characteristics and laboratory results of blood samples in post-COVID-19  
216 patients with and without hypertension: age, BMI, NT-proBNP, CRP, neutrophils, white blood  
217 cells (WBC), DD, fasting glucose, HbA1c, HGB, fibrinogen and ferritin (\* $p < 0.05$ , \*\* $p < 0.01$ ,  
218 \*\*\*\* $p < 0.0001$ ).

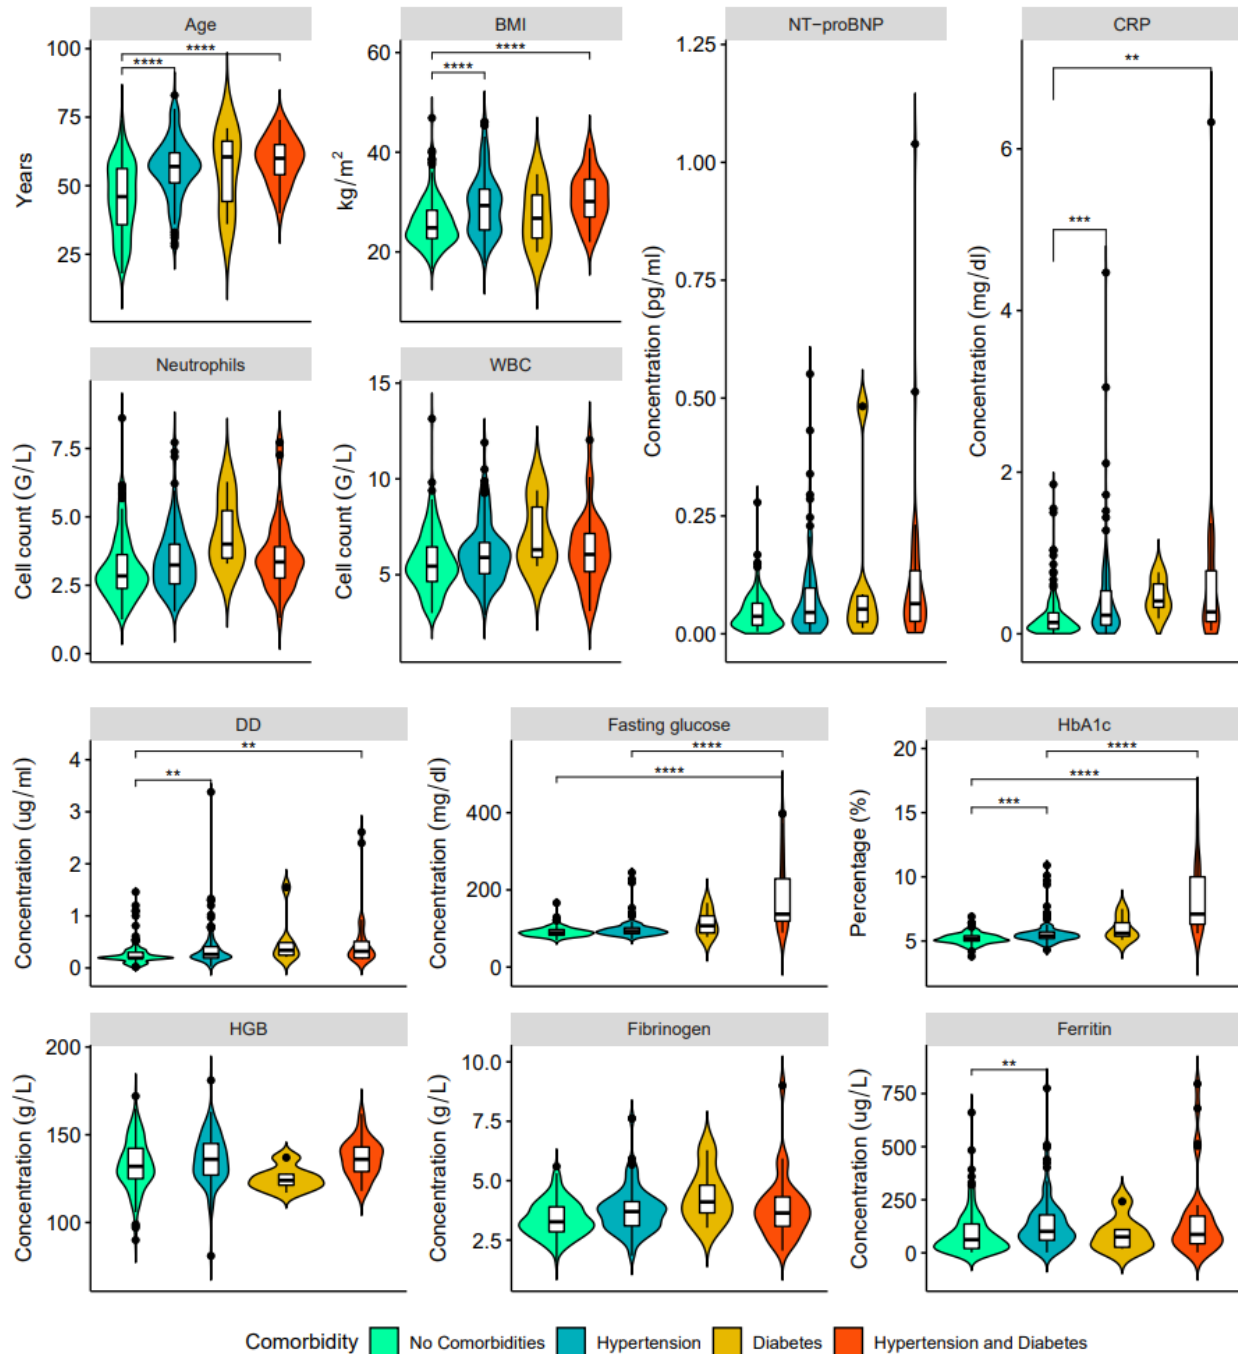

219  
220  
221  
222  
223  
224  
225  
226  
227

**Figure 4.** Clinical characteristics and laboratory results of blood samples in post-COVID-19 patients with no comorbidities (green), hypertension only (blue), type 2 diabetes mellitus only (orange) and both hypertension and type 2 diabetes (red): age, BMI, NT-proBNP, CRP, neutrophils, WBC, DD, fasting glucose, HbA1c, HGB, fibrinogen and ferritin (\*\* $p < 0.01$ , \*\*\* $p < 0.001$ , \*\*\*\* $p < 0.0001$ ).

### 3.3 Lung Function Screening

228 **Chest CT.** At the follow-up visit with mean of  $5.8 \pm 0.9$  months chest CT was conducted in 227  
 229 subjects (72.8%). All the chest CT findings are reported in **Table 4** from the most common to the  
 230 least common findings. 12 subjects (5.29%) had normal chest CT. The most common registered  
 231 CT abnormality was chronic bronchitis in (198, 87.2%) followed by fibrotic changes in (83,  
 232 36.6%) and mediastinal lymphadenopathy in (23, 10.1%). Most of the participants had more than  
 233 one CT changes. Median age of participants with lung abnormalities in chest CT was 55 years of  
 234 age (IQR, 7). on 227 (72.8%) participants. Other CT abnormalities included polysegmental  
 235 pneumonia, bronchiectasis, emphysema, bullous changes, atelectasis, and interstitial pneumonia  
 236 (**Appendix 3**). These chest CT findings do not have a comorbidity-associate predisposition.  
 237 However, fibrotic changes were found in 55 out of 158 patients with hypertension in comparison  
 238 to 30 out of 154 participants without hypertension. (**Figure 5A**).

239 Overall, 107 participants had chest CT during active COVID-19 infection, with the mean  
 240 percentage of lung defects  $36.5 \pm 22.6\%$ . Among those participants, 87 subjects (39.6%)  
 241 underwent chest CT at the follow-up, and 84 (96.6%) subjects had residual lung abnormalities  
 242 detected at the follow-up.

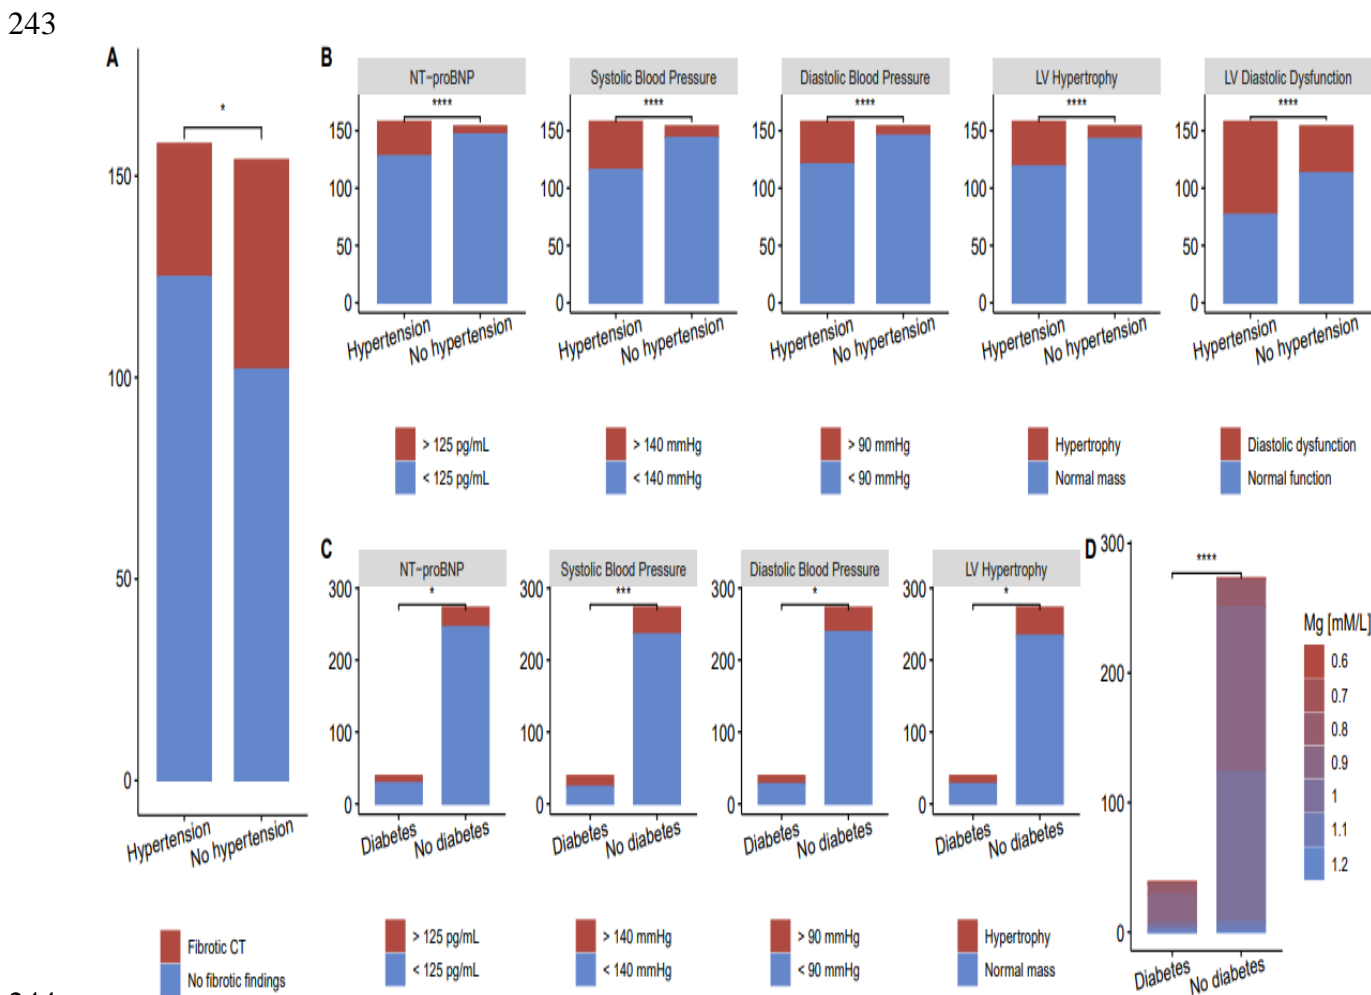

244 **Figure 5.** Fibrotic changes in CT scan of post-COVID-19 patients with hypertension (**A**).  
 245 Cardiac abnormalities in post-COVID-19 patients with and without hypertension (**B**); with and  
 246 without type 2 diabetes (**C**). (\* $p < 0.05$ , \*\*\* $p < 0.001$ , \*\*\*\* $p < 0.0001$ ).  
 247

248

249 **Spirometry test.** All participants had spirometry test at the follow-up visit and 143 subjects  
250 (45.8%) had spirometry without abnormalities. From 169 subjects (54.2%) with abnormal  
251 spirometry 118 subjects (37.8%) had restrictive pattern and 43 subjects (13.8%) had mixed  
252 results with mostly restrictive pattern. Only 8 subjects (2.6%) had obstructive defects detected in  
253 spirometry. Regarding participants with respiratory comorbidities (9), there were 1 participant  
254 with restrictive, 1 participant with obstructive, and 4 participants with mixed with mostly  
255 restrictive defects. 67 participants (60.3%) out of 111 hospitalized participants had abnormal  
256 spirometry results.

257 **Correlation between chest radiographs and 6MWT with lung function.** 125 (58.1%) out of  
258 215 subjects with abnormal chest CT at the follow-up had abnormalities in spirometry test. 89  
259 subjects (71.2%) had restrictive pattern, 30 subjects (24%) had mixed with mostly restrictive  
260 pattern, while 6 subjects (4.8%) had obstructive pattern in spirometry.

261 The median 6MWT in participants with abnormal spirometry was 381 (310;416) meters,  
262 significantly different from participants with normal spirometry (400 (350;450) meters,  $P =$   
263 0.004). 14 subjects (77.8%) out of 18 subjects with specific respiratory symptoms, including  
264 wheezing, dry cough, and cough with sputum, had abnormalities in chest CT at the follow-up.  
265 Meanwhile, 32 (68.9%) out of 45 subjects with dyspnea on exertion and 15 (83.3%) out of 18  
266 subjects with dyspnea on rest had abnormal chest CT scan.

267

### 268 **3.4 Cardiac screening**

269 All 312 participants underwent a cardiac screening (**Table 3**). Sinus bradycardia  $<50$ bpm was  
270 present in 4 participants (1.28%). 37 participants (11.9%) had higher NT-pro BNP levels ( $>$   
271 125pg/ml) and left ventricular ejection fraction was decreased in 50 participants (1.60%). The  
272 most common cardiac abnormality was decreased diastolic function of the left ventricle (122,  
273 39.1%). Left ventricular hypertrophy was present in all those participants. 50 (15.5%) had left  
274 ventricular hypertrophy, and 40 of them had preexisting hypertension. Meanwhile, 9 participants  
275 (18%) out of 50 with left ventricular hypertrophy did not have any cardiovascular comorbidities  
276 before the follow-up. Seven participants of those had left ventricular hypertrophy and diastolic  
277 dysfunction of LV, while 2 participants had dilatation of the left atrium in addition to left  
278 ventricular hypertrophy and diastolic dysfunction.

279 Holter ECG revealed heart rhythm disturbances in 9 participants for the first time (2.88%),  
280 including atrial fibrillation (4, 1.28%), AB block II degree (3, 0.96%), SA block (1, 0.32%), and  
281 RBBB (1, 0.32%). The median age of patients with the first onset of rhythm disturbances was 69  
282 years (IQR, 12), and no difference in gender was found. 2 patients with new-onset AF had  
283 preexisting hypertension, and one patient had newly reported hypertension at the follow-up.

284 The mean systolic blood pressure (SBP) of all participants was  $120.7 \pm 16$  mm Hg, and the mean  
285 diastolic blood pressure (DBP) was  $78.4 \pm 9.03$  mmHg with no significant difference between  
286 females and males. Participants with elevated sBP defined as  $\geq 140$  mmHg were present in 71  
287 subjects (22.8%).

288 24-hour blood pressure monitoring revealed 19 patients (6.10%) with elevated blood pressure  
289 either in the daytime or nighttime for the first time. The median age of participants with new-  
290 onset hypertension was 45 years (IQR, 12). One participant was pregnant during the screening,  
291 and none of the patients had cardiovascular conditions before the follow-up time. Two patients

292 had type 2 diabetes. One patient had LV hypertrophy, 7 had diastolic dysfunction of LV, one  
 293 patient had dilation of RA, and one patient was with dilation with LA.

294  
 295 **Table 3.** Cardiac abnormalities detected in cardiac assessment of post-COVID-19 patients.

| <b>Serum cardiac biomarker</b>                                                                                                                                                               | Total      |                 |
|----------------------------------------------------------------------------------------------------------------------------------------------------------------------------------------------|------------|-----------------|
| NT-proBNP > 125pg/ml                                                                                                                                                                         | 37 (11.9)  |                 |
| <b>Electrocardiography</b>                                                                                                                                                                   |            |                 |
| Sinus bradycardia <60bpm                                                                                                                                                                     | 26 (8.33)  |                 |
| Sinus bradycardia <50bpm                                                                                                                                                                     | 4 (1.28)   |                 |
|                                                                                                                                                                                              | Total      | Newly diagnosed |
| <b>Echocardiography</b>                                                                                                                                                                      |            |                 |
| Left ventricular ejection fraction <sup>†</sup> , %                                                                                                                                          | 61±4.55    |                 |
| Left ventricular ejection fraction <50%                                                                                                                                                      | 5 (1.60)   |                 |
| Left ventricular hypertrophy                                                                                                                                                                 | 50 (15.5)  | 7 (2.24)        |
| Diastolic dysfunction of left ventricle                                                                                                                                                      | 122 (39.1) | 2 (0.64)        |
| Dilation of right atrium                                                                                                                                                                     | 2 (0.64)   | 1 (0.32)        |
| Dilation of left atrium                                                                                                                                                                      | 12 (3.85)  |                 |
| <b>Holter electrocardiography</b>                                                                                                                                                            |            |                 |
| Atrial Fibrillation                                                                                                                                                                          | 5 (1.60)   | 4 (1.28)        |
| AV block II degree                                                                                                                                                                           | 4 (0.32)   | 3 (0.96)        |
| Sinoatrial block                                                                                                                                                                             | 1 (0.32)   | 1 (0.32)        |
| RBBB                                                                                                                                                                                         | 1 (0.32)   | 1 (0.32)        |
| <b>24-hr BPM</b>                                                                                                                                                                             |            |                 |
| Mean SBP ≥140mmHg                                                                                                                                                                            | 71 (22.8)  | 19 (6.10)       |
| Mean DBP ≥90 mm Hg                                                                                                                                                                           | 49 (15.7)  | 19 (6.10)       |
| Note. – Except where indicated, data are numbers of participants, with percentages in parentheses.<br>24-hr BPM – 24-hour blood pressure monitoring<br>† data are means ± standard deviation |            |                 |

296  
 297 Cardiac abnormalities in patients with hypertension and diabetes type 2 compared to  
 298 participants with no comorbidities are shown in **Figure 5B** and **5C** respectively. 24-hour blood  
 299 pressure monitoring revealed significantly higher systolic and diastolic blood pressure, left  
 300 ventricular hypertrophy and elevated NT-proBNP in participants with hypertension and subjects  
 301 with type 2 diabetes. Left ventricular diastolic dysfunction more frequently present in patients  
 302 with hypertension.  
 303

304 **Laboratory results.** The results of blood laboratory analysis at the follow-up are reported  
 305 in **Table 4** and **Figures 2-4**. The minority of subjects had persistent inflammatory markers at the  
 306 follow-up, including neutrophilia in 18 subjects (5.77%) and increased CRP levels in 54 subjects  
 307 (17.3%). 28 subjects (8.97%) had leukopenia with WBC < 4x10<sup>9</sup>/l and 13 subjects (4.17%) had  
 308 lymphopenia with lymphocytes<1.18x 10<sup>3</sup>/l.

309 Immunological test results showed that SARS-CoV19 IgM antibodies were present in 9 subjects  
 310 (2.88%). Among those, 5 participants had follow-up at 5th months after the onset of the disease,  
 311 while the other 4 participants had follow-up at 6th months. SARS-CoV19 IgG antibodies were  
 312 present in 241 subjects (77.2%) and were <10 AH/ml in 71 participants (22.8%). Meanwhile,  
 313 increased CMV IgG titers defined as >0.5 U/ml were present in almost all 312 participants.

314  
 315 **Table 4.** Laboratory results of blood sample in participants after COVID-19 infection with  
 316 median follow-up of 6 months.

|                              | Normal range | Total (n=312)    |             | Female (n=211)   | Male (n=101)     | P-value |
|------------------------------|--------------|------------------|-------------|------------------|------------------|---------|
|                              |              | Media n (IQR)    | n (%)       |                  |                  |         |
| WBC (x 10 <sup>9</sup> /l)   | 4.5 - 11     | 5.73 (6.67;4.85) |             | 5.68 (4.71;6.74) | 5.84 (5.1;6.52)  | 0.354   |
| <4                           |              |                  | 28 (8.97)   |                  |                  |         |
| 4-11                         |              |                  | 282 (90.38) |                  |                  |         |
| >11                          |              |                  | 2 (0.64)    |                  |                  |         |
| NEUT (x 10 <sup>3</sup> /l)  | 1.56 - 5.38  | 3.11 (2.49;3.9)  |             | 3.1 (2.43;3.92)  | 3.11 (2.55;3.73) | 0.762   |
| <1.56                        |              |                  | 5 (1.60)    |                  |                  |         |
| 1.56-5.38                    |              |                  | 289 (92.6)  |                  |                  |         |
| >5.38                        |              |                  | 18 (5.77)   |                  |                  |         |
| LYMPH (x 10 <sup>3</sup> /l) | 1.18 - 3.57  | 1.9 (1.62;2.28)  |             | 1.9 (1.56;2.28)  | 1.95 (1.71;2.26) | 0.276   |
| <1.18                        |              |                  | 13 (4.17)   |                  |                  |         |
| 1.18-3.57                    |              |                  | 291 (93.3)  |                  |                  |         |
| >3.57                        |              |                  | 8 (2.56)    |                  |                  |         |
| HGB (g/l)                    | 120 - 160    | 134 (126;143)    |             | 129 (123;135)    | 148 (141;153)    | 0.000   |
| <120                         |              |                  | 34 (10.9)   |                  |                  |         |
| PLT (x 10 <sup>9</sup> /l)   | 140 - 400    | 265 (314;230)    |             | 271 (236;327)    | 254 (219;296)    | 0.006   |

|                                                          |             |                     |                                       |                      |                      |       |
|----------------------------------------------------------|-------------|---------------------|---------------------------------------|----------------------|----------------------|-------|
| <140<br>140-400<br>>400                                  |             |                     | 9 (2.88)<br>288 (92.3)<br>15 (4.81)   |                      |                      |       |
| CRP<br>(mg/dl)<br><br>>0.5                               | 0 – 0.5     | 0.19<br>(0.09;0.41) |                                       | 0.19<br>(0.08;0.48)  | 0.18<br>(0.09;0.34)  | 0.509 |
|                                                          |             |                     | 54 (17.3)                             |                      |                      |       |
| Creatinine<br>(mg/dl)<br><br><0.67<br>0.67-1.17<br>>1.17 | 0.67 - 1.17 | 0.81<br>(0.71;0.94) |                                       | 0.75<br>(0.68;0.84)  | 0.96<br>(0.86;1.08)  | 0.000 |
|                                                          |             |                     | 50 (16.0)<br>250 (80.1)<br>12 (3.85)  |                      |                      |       |
| ALT<br>(U/l)<br><br>≤50<br>>50                           | 0 - 50      | 18.9<br>(12.2;26.9) |                                       | 17.63<br>(12.0;24.6) | 20.35<br>(13.9;33.7) | 0.018 |
|                                                          |             |                     | 287 (91.9)<br>25 (8.01)               |                      |                      |       |
| Glucose<br>(mg/dl)<br><br><74<br>74-106<br>>106          | 74 - 106    |                     |                                       | 92<br>(84.2;101.4)   | 94<br>(86.4;105)     | 0.213 |
|                                                          |             |                     | 10 (3.21)<br>234 (75.00)<br>68 (21.8) |                      |                      |       |
| Ferritin<br>(ug/l)<br><br><30<br>30-400<br>>400          | 30 - 400    | 82.9<br>(35.3;156)  |                                       | 62<br>(20.8;107)     | 148.7<br>(86.7;222)  | 0.000 |
|                                                          |             |                     | 72 (23.1)<br>228 (73.1)<br>12 (3.85)  |                      |                      |       |
| Fibrin<br>ogen<br>(g/l)<br><br><2<br>2-3.93<br>>3.93     | 2 - 3.93    | 3.49<br>(2.99;4.04) |                                       | 3.56<br>(3.02;4.04)  | 3.34<br>(2.82;4.04)  | 0.112 |
|                                                          |             |                     | 3 (0.96)<br>220 (70.5)<br>89 (28.5)   |                      |                      |       |
| D-<br>dimer<br>(mg/l)<br><br>0-0.50<br>>0.50             | 0 – 0.50    | 0.23<br>(0.19;0.36) |                                       | 0.25<br>(0.19;0.37)  | 0.19<br>(0.19;0.31)  | 0.017 |
|                                                          |             |                     | 269 (86.2)<br>43 (13.8)               |                      |                      |       |
| Urea                                                     | 17-43       | 29.5                |                                       | 30                   | 29.2                 | 0.301 |



|                                                                                                                    |         |                   |            |                     |                  |       |
|--------------------------------------------------------------------------------------------------------------------|---------|-------------------|------------|---------------------|------------------|-------|
| (mg/dl)                                                                                                            |         | (24.1;36)         |            | (24.5;36.2)         | (23.8;35.1)      |       |
| >43                                                                                                                |         |                   | 22 (7.05)  |                     |                  |       |
| Vitamin B12 (pg/ml)                                                                                                | 182-820 | 475.1 (348;602)   |            | 493.3 (368.3;621.9) | 418 (312.9;563)  | 0.021 |
| <182                                                                                                               |         |                   | 24 (7.69)  |                     |                  |       |
| 182-820                                                                                                            |         |                   | 252 (80.8) |                     |                  |       |
| >820                                                                                                               |         |                   | 36 (11.6)  |                     |                  |       |
| Vitamin D (ng/ml)                                                                                                  | 30-100  | 18.33 (11.1;30.6) |            | 20.3 (11.5;32.2)    | 15.7 (10.1;28.4) | 0.024 |
| <30                                                                                                                |         |                   | 232 (74.4) |                     |                  |       |
| ≥30                                                                                                                |         |                   | 80 (25.6)  |                     |                  |       |
| Hb1Ac (%)                                                                                                          | 4.8-5.9 | 5.4 (5.1;5.7)     |            | 5.3 (5;5.7)         | 5.5 (5.15;5.85)  | 0.032 |
| >5.9                                                                                                               |         |                   | 59 (18.9)  |                     |                  |       |
| Total cholesterol (mmol/l)                                                                                         | <5.2    | 4.89 (4.29;5.52)  |            | 4.90 (4.31;5.63)    | 4.87 (4.17;5.38) | 0.442 |
| >5.2                                                                                                               |         |                   | 100 (32.1) |                     |                  |       |
| SARS COV IgM                                                                                                       | 0-10    | 0.54 (0.35;1.18)  |            | 0.61 (0.36;1.21)    | 0.48 (0.30;1.07) | 0.036 |
| >10                                                                                                                |         |                   | 9 (2.88)   |                     |                  |       |
| SARS CoV IgG (AH/ml)                                                                                               | 0-10    | 34.39 (12.5;66.1) |            | 34.6 (12.2;65.1)    | 31.1 (13.1;68.6) | 0.871 |
| <10                                                                                                                |         |                   | 71 (22.8)  |                     |                  |       |
| CMV IgM (COI)                                                                                                      | 0-0.7   | 0.16 (0.14;0.23)  |            | 0.17 (0.14;0.25)    | 0.15 (0.14;0.19) | 0.090 |
| >0.7                                                                                                               |         |                   | 14 (4.49)  |                     |                  |       |
| CMV IgG (U/ml)                                                                                                     | 0-0.5   | 490 (233;500)     |            | 500 (277;500)       | 446 (183;500)    | 0.142 |
| >0.5                                                                                                               |         |                   | 308 (99.0) |                     |                  |       |
| Note.— <i>P</i> values comparing female and male participants were determined with the Mann-Whitney <i>U</i> test. |         |                   |            |                     |                  |       |

|                                      |
|--------------------------------------|
| WBC – white blood cells              |
| NEUT – neutrophils                   |
| LYMPH – lymphocytes                  |
| HGB – hemoglobin                     |
| PLT – platelets                      |
| ESR – erythrocyte sedimentation rate |
| CRP – C-reactive protein             |

317

#### 318 **4. Discussion**

319 In our study 6 months after acute illness with COVID-19, most of patients still meet the criteria  
320 for long COVID-19 and show at least one persistent symptom. These results are mainly in line  
321 with studies reporting the prevalence of long COVID-19 in patients 3 to 6 months after COVID-  
322 19 (Al-Aly et al., 2021; Huang C et al., 2021; Nasserie et al., 2021; Nehme et al., 2021). Long-  
323 Covid-19 symptoms have similarities with chronic fatigue syndrome developed after viral  
324 infections (Holmes et al., 1988; Hickie et al., 2006) and may afflict a wide range of organs, with  
325 the most common symptoms being chronic fatigue, shortness of breath, cognitive impairments  
326 (Cares-Marambio et al., 2021; Shah et al., 2021; Davido et al., 2020; Halpin et al., 2020).

327 The pathophysiology of long COVID-19 respiratory and multi-organ sequelae has a  
328 fundamental knowledge gap that must be addressed (Lerner et al., 2021). Viral infections are  
329 considered to be cofactors for the initiation and exacerbation of lung fibrosis (Naik, Moore,  
330 2010), and clinical evidence suggesting cardiovascular involvement has been reported for  
331 essentially all known viral infections (Abelmann, 1971). Observational studies revealed a high  
332 percentage of post-COVID-19 sequelae such as respiratory problems, lung fibrosis (Lechowicz  
333 et al., 2020; Ali et al., 2021), and cardiovascular problems (Bose, McCarthy, 2020). Moreover,  
334 long COVID-19 affects even mild-to-moderate cases of survivors of COVID-19 with pulmonary  
335 sequelae reported after recovery (Wang et al., 2020). Secondly, our study demonstrated that  
336 deranged blood indices (increased neutrophils, WBC, changed coagulation profile-significantly  
337 increased DD; fasting glucose, HbA1c, HGB) and raised inflammatory marker (CRP) are  
338 associated with pre-existing comorbidities, specifically, hypertension and diabetes. HbA1c is  
339 considered the gold standard for evaluating blood glucose levels (Nalysnyk et al., 2010) and is  
340 considered to be associated with inflammation, hypercoagulability, blood oxygen saturation, and  
341 higher mortality rate in COVID-19 patients (Wang et al., 2020).

342 Hypertension affects more than a quarter of the global population (Kearney et al., 2005;  
343 Forouzanfar et al., 2017), has been identified as a major risk factor for COVID-19 severity  
344 (Liang et al., 2020; Madhur et al., 2021) and higher risk of dying from COVID-19 (Gao et al.,  
345 2020). Moreover, hypertension is closely associated with other comorbidities, predominantly  
346 obesity and diabetes, and significantly affects inflammation (Jayedi et al., 2019). In this study,  
347 hypertension, besides the above-mentioned significant changes in blood and inflammatory  
348 markers that coincided with other comorbidities (diabetes), also revealed significant changes in  
349 fibrinogen (Fbg) and ferritin levels. Changes in Fbg levels can be associated with a substantial  
350 rearrangement in blood vessel walls observed in individuals with pre-existing hypertension. The  
351 abnormal Fbg levels have a strong association to COVID-19 disease severity (rev. Len et al.,  
352 2022), and assessment of Fbg levels at admission is important for determining of prognosis of  
353 COVID-19 patients (Long et al., 2021). Abnormal Fbg levels are observed in post-COVID-19  
354 cohorts by different groups (Tartari et al., 2021). Cardiovascular changes associated with

355 COVID-19 may lead to left ventricular dysfunction (Medranda et al., 2021), which in our cohort  
356 had a higher prevalence in convalescent patients with hypertension.

357 Cardiac screening showed a mean ejection fraction  $61 \pm 4.55\%$ , which is less than in  
358 participants observed 1-4 weeks after discharge (Zhou, 2021). This can be explained by a higher  
359 prevalence of chronic heart diseases, including hypertension and CAD, in our cohort of  
360 participants. Interestingly, our study revealed new cases of left ventricular hypertrophy and  
361 diastolic dysfunction of LV in participants with no preexisting cardiovascular disorders. In  
362 addition, 19 participants had newly diagnosed hypertension during the follow-up. The patients  
363 with newly diagnosed hypertension were young (median, 45 years) and had no preexisting  
364 cardiovascular comorbidities before the follow-up. However, echocardiography revealed long-  
365 term complications in some of those patients, meaning that hypertension might have been before  
366 the 6-month follow-up and COVID-19 infection. In addition to hypertension and LV  
367 dysfunction, our study found 9 new cases of rhythm disturbances detected in 24-hour BP  
368 monitoring. Newly detected rhythm disturbances included atrial fibrillation (AF), AB block II  
369 degree, sinoatrial (SA) block, and RBBB (**Table 3**).

370 Although our cohort was limited to establishing the time of the onset of hypertension in the  
371 post-COVID-19 period, our findings in patients with no preexisting cardiac comorbidities and  
372 standard echocardiography suggest the presence of the long-term effect of COVID-19 on cardiac  
373 function. The evidence of cardiac injury in post-COVID-19 patients (left ventricular ejection  
374 fraction and diastolic dysfunction) and the appearance of arrhythmias corroborate with the  
375 findings of other investigators (rev. Satterfield et al., 2022; Tudoran et al., 2022). The  
376 arrhythmias in post-COVID patients were found to be associated with COVID-19 disease  
377 severity (Mohammad et al., 2021).

378 In patients with COVID-19, the viral infection may initiate inflammation with subsequent  
379 fibrosis, and cardiac inflammation and fibrosis are major pathological mechanisms leading to  
380 heart failure (Suthahar et al., 2017). Non-invasive imaging, blood analysis for fibrosis markers,  
381 and endomyocardial biopsy (EMB) are used to detect fibrosis (Raafs et al., 2021). The primary  
382 imaging technique in contemporary heart failure management is echocardiography; however, it  
383 provides little information about the extent of fibrosis (de Boer et al., 2019). To evaluate the  
384 cardiac and lung changes we used echocardiography and the chest CT.

385 The question if the lung is a target organ for diabetes mellitus has been discussed, and a body  
386 of clinical and experimental evidence indicates that fibrosis and other pulmonary complications  
387 are more prevalent than it was early recognized (Sandler, 1990; Hsia, Raskin, 2005; Yang et al.,  
388 2011). Critically fibrotic changes on follow-up CT scans were significantly associated with  
389 hypertension but not diabetes (**Figure 5**). The presence of diabetes and new-onset diabetes was  
390 an independent factor associated with poor outcomes during different coronavirus infections –  
391 SARS-CoV-1 (Yang et al., 2006), MERS-CoV (Alraddadi et al., 2016), and SARS-CoV-2 (rev.  
392 Singh, Singh, 2020). In our study, hypertension had a significant association with fibrotic  
393 changes on CT-scan, whereas diabetes type II did not. One of the possible explanations can be a  
394 small percentage of patients with diabetes type II in our Long COVID-19 cohort. However, we  
395 may also speculate that the fibrotic changes in post-COVID-19 develop faster when blood  
396 vessels are already affected by hypertension. It was reported that abnormal lung CT findings  
397 could present even in asymptomatic or mild COVID-19 patients (Shi et al., 2020). The  
398 association of radiological CT findings with hypertension in Long COVID-19 makes  
399 hypertension, in combination with other results (high fibrinogen, DD, etc.), a possible early  
400 marker of developing fibrotic lung changes.

401 Laboratory tests identified the long-term persistence of IgM antibodies in 9 patients from our  
402 cohort (5-6 months). The IgM antibodies at COVID-19 infection peak early and rapidly decline  
403 (rev. Huang AT et al., 2020; Mallon et al., 2021; Štěpánek et al., 2022). IgM seropositivity was  
404 found to be correlating with a symptom duration (Štěpánek et al., 2022). Moreover, the long-  
405 term persistence of anti-SARS-CoV-2 IgM antibodies was recently reported by Bichara and  
406 colleagues (2021), who observed a long 8-months persistence of the IgM antibodies after  
407 COVID-19 infection in two patients. The prolonged persistence of anti-viral IgM antibodies was  
408 described after different acute viral infections and live viral vaccines: the Japanese encephalitis  
409 live vaccine (Hills et al., 2021), acute hepatitis A infection (Kao et al., 1984), dengue virus  
410 infection (Chien et al., 2018), Zika virus > 2 years (Griffin et al. 2019), yellow fever virus  
411 vaccine > 3-4 years (Gibney et al., 2012), and in cerebrospinal liquid and blood of patients after  
412 West Nile virus infection (Kapoor et al., 2004; Roehrig et al., 2003; Papa et al., 2011; Murray et  
413 al., 2013) in some cases up to 8 years after infection. The finding of long persistence of IgM  
414 antibodies in some participants of the post-COVID-19 cohort warrants additional investigation,  
415 particularly the determination of whether persistence of IgM is related to persistent infection  
416 with SARS-CoV2. However, the finding of elevated IgG anti-CMV antibodies in most of the  
417 cohort should be interpreted with caution due to the possibility of cross-reactivity between viral  
418 epitopes and human tissue antigens (Kreye et al., 2020; Vojdani et al., 2021).

419 According to Chalder Fatigue Score, the prevalence of some symptoms, as well as  
420 neurological symptoms had a significant association with the female gender. This finding  
421 corroborates the recent conclusions of another prospective study of Long COVID-19 syndrome  
422 (Bai et al., 2022).

423 There are several limitations of our study: (1) Patients only with persistent symptoms were  
424 selected for the study, and there was no control group for comparison of patients with and  
425 without the Long COVID-19 syndrome; (2) The absence of baseline health data and CT-imaging  
426 data before the infection and before the mean of 6 months of follow-up limits the assessment of  
427 changes in patient's results; (3) Social information of patients, including the number of years of  
428 smoking, alcohol use, and lifestyle, was not reported, which might have a confounding effect on  
429 some of the results. We did not include in the asymptomatic cohort individuals with a mild  
430 phenotype of disease though non-hospitalized subjects with moderate post-COVID-19 were  
431 included; (4) We had some limitations on cardiovascular measures. It would not be appropriate  
432 or feasible to obtain histological data from otherwise healthy subjects. The data in this study  
433 permit a 6-months assessment of Long-COVID-19 sequelae. Long-term prospective studies of  
434 longer duration are still needed.

435

## 436 **5. Conclusions**

437 In the 6-months follow up Long COVID-19 cohort, among the tested parameters, those  
438 positively correlated with comorbid conditions include age, BMI, D-dimers, NT-proBNP, C-  
439 reactive protein, neutrophils, fasting glucose, and HbA1c; hypertension also shows three  
440 associations that were not found in patients when examining the role of diabetes: increased  
441 hemoglobin, fibrinogen, and ferritin. In addition to hypertension and LV dysfunction, our study  
442 found new cases of rhythm disturbances detected in 24-hour BP monitoring that included atrial  
443 fibrillation (AF), AB block II degree, sinoatrial (SA) block, and RBBB. We speculate that due to  
444 the significant association of hypertension with CT fibrotic changes, it may serve as an early  
445 predictive marker (in combination with high Fbg and DD) for the development of lung  
446 parenchymal diseases in post-COVID-19.

447 With the new outbreaks of SARS-CoV-2 infection in many countries, it is expected that the  
448 patients' burden having Long COVID-19 respiratory and cardiovascular sequelae is going to  
449 increase and lead to another public health crisis following the current pandemic. Thus, it is vital  
450 for further research comprising longer-ranging observational studies critical to evaluate the long-  
451 term consequences of COVID-19. The preliminary study presented here can be prolonged to 12  
452 and 24 follow-ups. This will enable us to study the long-term effects of Long COVID-19 and  
453 identify symptoms significant for medical treatment and observation.

454

## 455 **References**

456 Abelmann WH. Virus and the heart. *Circulation* (1971) 44: 950-956.

457 Al-Aly Z, Xie Y, Bowe B. High-dimensional characterization of post-acute sequelae of COVID-  
458 19. *Nature* (2021) 594:259–64. <http://dx.doi.org/10.1038/s41586-021-03553-9>.

459 Ali RMM, Ghonimy MBI. Post-COVID-19 pneumonia lung fibrosis: A worrisome sequelae in  
460 surviving patients. *Egypt. J. Radiol. Nucl. Med.* (2021) 52: 101. [https://doi.org/10.1186/s43055-](https://doi.org/10.1186/s43055-021-00484-3)  
461 021-00484-3.

462 Alraddadi BM, Watson JT, Almarashi A, Abedi GR, Turkistani A, et al. Risk factors for primary  
463 Middle East respiratory syndrome coronavirus illness in humans, Saudi Arabia, 2014. *Emerging*  
464 *Infect. Dis.* (2016) 22:49. doi: 10.3201/eid2201.151340.

465 American College Cardiology. Coronavirus Disease 2019 (COVID-19) Provides Potent  
466 Reminder of the Risk of Infectious Agents. 2020. [https://www.acc.org/latest-in-](https://www.acc.org/latest-in-cardiology/articles/2020/03/01/08/42/feature-coronavirus-disease-2019-covid-19-providespotent-reminder-of-the-risk-of-infectious-agents)  
467 [cardiology/articles/2020/03/01/08/42/](https://www.acc.org/latest-in-cardiology/articles/2020/03/01/08/42/feature-coronavirus-disease-2019-covid-19-providespotent-reminder-of-the-risk-of-infectious-agents)  
468 [feature-coronavirus-disease-2019-covid-19-](https://www.acc.org/latest-in-cardiology/articles/2020/03/01/08/42/feature-coronavirus-disease-2019-covid-19-providespotent-reminder-of-the-risk-of-infectious-agents)  
providespotent-reminder-of-the-risk-of-infectious-agents.

469 Bai F, Tomasoni D, Falcinella C, Barbanotti D, Castoldi R, Mulè G, Augello M, Mondatore D,  
470 Allegrini M, Cona A, Tesoro D. Female gender is associated with long COVID syndrome: a  
471 prospective cohort study. *Clinical Microbiol Infection* (2022) 28:611-e9.  
472 <https://doi.org/10.1016/j.cmi.2021.11.002>.

473 Bichara CD, Amoras ES, Vaz GL, Bichara CN, Amaral IP, Vallinoto AC. Persistence of Anti-  
474 SARS-CoV-2 IgM Antibody up to 8 Months Post-COVID-19. *Case Reports in Clinical*  
475 *Medicine* (2021), 10:227-31. DOI: 10.4236/crcm.2021.109029.

476 Cares-Marambio K, Montenegro-Jimenez Y, Torres-Castro R, et al. Prevalence of potential  
477 respiratory symptoms in survivors of hospital admission after coronavirus disease 2019  
478 (COVID-19): A systematic review and meta-analysis. *Chron Respir Dis.* (2021)  
479 18:14799731211002240.

480 Cheng L, Li H, Li L, Liu C, Yan S, Chen H, Li Y. Ferritin in the coronavirus disease 2019  
481 (COVID-19): a systematic review and meta-analysis. *J Clin Laboratory Analysis* (2020) 34:  
482 e23618. <https://doi.org/10.1002/jcla.23618>.

483 Chien YW, Liu ZH, Tseng FC, Ho TC, Guo HR, Ko NY, Ko WC, Perng GC. Prolonged  
484 persistence of IgM against dengue virus detected by commonly used commercial assays. *BMC*  
485 *Infect Dis* (2018) 18:1-7. <https://doi.org/10.1186/s12879-018-3058-0>.

- 486 Cuomo G, Puzzolante C, Iadisernia V, Santoro A, Menozzi M, et al. Development of post-  
487 COVID-19 cardiovascular events: an analysis of clinical features and risk factors from a single  
488 hospital retrospective study. *UNIMORE IRIS* (2021) 2021: 538-549.
- 489 Das KM, Lee EY, Singh R, et al. Follow-up chest radiographic findings in patients with MERS-  
490 CoV after recovery. *Indian J Radiol Imaging* (2017) 27:342–349. DOI:  
491 10.4103/ijri.IJRI\_469\_16.
- 492 de Almeida-Pititto B, Dualib PM, Zajdenverg L, Dantas JR, De Souza FD et al. Severity and  
493 mortality of COVID 19 in patients with diabetes, hypertension and cardiovascular disease: a  
494 meta-analysis. *Diabetology & Metabolic Syndrome* (2020) 12:75 [https://doi.org/10.1186/s13098-](https://doi.org/10.1186/s13098-020-00586-4)  
495 020-00586-4.
- 496 de Boer RA, De Keulenaer G, Bauersachs J, Brutsaert D, Cleland JG et al. Towards better  
497 definition, quantification and treatment of fibrosis in heart failure. A scientific roadmap by the  
498 Committee of Translational Research of the Heart Failure Association (HFA) of the European  
499 Society of Cardiology. *European J of Heart Failure* (2019) 21:272-85.  
500 <https://doi.org/10.1002/ejhf.1406>.
- 501 Davido B, Seang S, Tubiana R, de Truchis P. Post–COVID-19 chronic symptoms: a  
502 postinfectious entity? *Clin Microbiol Infect.* (2020) 26:1448–9.  
503 <https://doi.org/10.1016/j.cmi.2020.07.028>.
- 504 Deng Q, Hu B, Zhang Y, Wang H, et al. Suspected myocardial injury in patients with COVID-  
505 19: Evidence from front-line clinical observation in Wuhan, China. *Int J Cardiol.* (2020) 311:  
506 116-121. <https://doi.org/10.1016/j.ijcard.2020.03.087>.
- 507 Gao C, Cai Y, Zhang K, Zhou L, Zhang Y, Zhang X, et al. Association of hypertension and  
508 antihypertensive treatment with COVID-19 mortality: a retrospective observational  
509 study. *European Heart J* (2020) 41: 2058-2066. <https://doi.org/10.1093/eurheartj/ehaa433>.
- 510 Fabri L, Moss, S, Khan F, Chi W, Xia J. 2021. Post-viral parenchymal lung disease following  
511 COVID-19 hospitalization: a systematic review and meta-analysis. MedRxiv  
512 doi: <https://doi.org/10.1101/2021.03.15.21253593> (Accepted, *Thorax*).
- 513 Forouzanfar MH, Liu P, Roth GA, Ng M, Biryukov S, Marczak L, et al. Global burden of  
514 hypertension and systolic blood pressure of at least 110 to 115 mm Hg, 1990–2015. *JAMA*  
515 (2017) 317: 165–82. doi:10.1001/jama.2016.19043.
- 516 Fortini A, Torrigiani A, Sbaragli S, Lo Forte A, Crociani A, Cecchini P, et al. COVID-19:  
517 persistence of symptoms and lung alterations after 3–6 months from hospital discharge. *Infection*  
518 (2021) 49: 1007-1015. <https://doi.org/10.1007/s15010-021-01638-1>.
- 519 Fumagalli A, Misuraca C, Bianchi A, Borsa N, Limonta S, Maggiolini S et al. 2021 Long-term  
520 changes in pulmonary function among patients surviving to COVID-19 pneumonia. *Infection*  
521 (2021): 1-4. <https://doi.org/10.1007/s15010-021-01718-2>.
- 522 Furukawa NW, Brooks JT, Sobel J. Evidence supporting transmission of severe acute respiratory  
523 syndrome coronavirus 2 while pre-symptomatic or asymptomatic. *Emerg Infect Dis* (2020) 26:  
524 e201595. doi: 10.3201/eid2607.201595.

- 525 Gibney KB, Edupuganti S, Panella AJ, Kosoy OI, Delorey MJ, Lanciotti RS, Mulligan MJ,  
526 Fischer M, Staples JE. Detection of anti-yellow fever virus immunoglobulin M antibodies at 3–4  
527 years following yellow fever vaccination. *American J Tropical Med Hygiene* (2012) 87:1112.
- 528 Griffin I, Martin SW, Fischer M, Chambers TV, Kosoy OL, Goldberg C, Falise A, Villamil V,  
529 Ponomareva O, Gillis LD, Blackmore C. Zika virus IgM 25 months after symptom onset, Miami-  
530 Dade county, Florida, USA. *Emerging Infect Dis.* (2019) 25:2264. doi: 10.3201/eid2512.191022.
- 531 Halpin SJ, McIvor C, Whyatt G, Adams A, Harvey O, McLean L, et al. Postdischarge symptoms  
532 and rehabilitation needs in survivors of COVID-19 infection: a cross-sectional evaluation. *J Med*  
533 *Virol* (2020) 2020:1–10. <https://doi.org/10.1002/jmv.26368>.
- 534 Han H, Xie L, Liu R, et al. Analysis of heart injury laboratory parameters in 273 COVID-19  
535 patients in one hospital in Wuhan, China. *J Med Virol.* (2020) 92: 819-23.  
536 <https://doi.org/10.1002/jmv.25809>.
- 537 Hickie I, Davenport T, Wakefield D, Vollmer-Conna U, Cameron B, et al. Post-infective and  
538 chronic fatigue syndromes precipitated by viral and non-viral pathogens: prospective cohort  
539 study. *BMJ* 333: 575 (2006). doi: <https://doi.org/10.1136/bmj.38933.585764.AE>.
- 540 Hills SL, Van Keulen A, Feser J, Panella A, Letson GW, Staples JE, Marfin AA, Brault AC.  
541 Persistence of IgM antibodies after vaccination with live attenuated Japanese encephalitis  
542 vaccine. *American J Tropical Med Hygiene* (2021) 104:576. doi: 10.4269/ajtmh.20-1132.
- 543 Holmes GP, Kaplan JE, Gantz NM, Komaroff, AL, Schonberger LB, et al. Chronic fatigue  
544 syndrome: a working case definition. *Annals Internal Med* (1988) 108:387-389.  
545 <https://doi.org/10.7326/0003-4819-108-3-387>.
- 546 Hsia CC, Raskin P. The diabetic lung: relevance of alveolar microangiopathy for the use of  
547 inhaled insulin. *American J Medicine* (2005)118: 205-11.  
548 <https://doi.org/10.1016/j.amjmed.2004.09.019>.
- 549 Huang AT, Garcia-Carreras B, Hitchings MD, Yang B, Katzelnick LC, et al. A systematic  
550 review of antibody mediated immunity to coronaviruses: kinetics, correlates of protection, and  
551 association with severity. *Nature Comm* (2020) 11:1-6. [https://doi.org/10.1038/s41467-020-](https://doi.org/10.1038/s41467-020-18450-4)  
552 18450-4.
- 553 Huang C, Huang L, Wang Y, Li X, Ren L, Gu X 6-month consequences of COVID-19 in  
554 patients discharged from hospital: a cohort study. *Lancet* (2021) 397:220-32.  
555 doi: [http://dx.doi.org/10.1016/S0140-6736\(20\)32656-8](http://dx.doi.org/10.1016/S0140-6736(20)32656-8).
- 556 Jayedi A, Rahimi K, Bautista LE, Nazarzadeh M, Zargar MS, et al. Inflammation markers and  
557 risk of developing hypertension: a meta-analysis of cohort studies. *Heart* (2019) 105: 686-692.  
558 doi: 10.1136/heartjnl-2018-314625.
- 559 Kao HW, Ashcavai M, Redeker AG. The persistence of hepatitis A IgM antibody after acute  
560 clinical hepatitis A. *Hepatology* (1984) 4: 933-936. <https://doi.org/10.1002/hep.1840040525>.
- 561 Kapoor H, Signs K, Somsel P, Downes FP, Clark PA, Massey JP. Persistence of West Nile Virus  
562 (WNV) IgM antibodies in cerebrospinal fluid from patients with CNS disease. *J Clin Virol*  
563 (2004) 31:289-91. <https://doi.org/10.1016/j.jcv.2004.05.017>.

- 564 Kearney PM, Whelton M, Reynolds K, Muntner P, Whelton PK, He J. Global burden of  
565 hypertension: analysis of worldwide data. *Lancet* (2005) 365:217–23.  
566 [https://doi.org/10.1016/S0140-6736\(05\)17741-1](https://doi.org/10.1016/S0140-6736(05)17741-1).
- 567 Kreye J, Reincke SM, Prüss H. Do cross-reactive antibodies cause neuropathology in COVID-  
568 19? *Nat Rev Immunol.* (2020) 20:645–646. <https://doi.org/10.1038/s41577-020-00458-y>.
- 569 Lechowicz K, Drozd`zal S, Machaj F, Rosik J, Szostak B et al. COVID-19: The potential  
570 treatment of pulmonary fibrosis associated with SARS-CoV-2 infection. *JCM* (2020) 9: 1917.  
571 <https://doi.org/10.3390/jcm9061917>.
- 572 Len P, Iskakova G, Sautbayeva Z, Kussanova A., Taeukelova AT et al. 2022. Meta-analysis and  
573 systematic review of coagulation disbalances in COVID-19: 41 studies and 17,601 patients.  
574 *Frontiers Cardiovascular Med* 9: 794092. doi: 10.3389/fcvm.2022.794092.
- 575 Lerner AM, Robinson DA, Yang L, et al. 2021. Toward understanding COVID-19 recovery:  
576 National Institutes of Health workshop on postacute COVID-19. *Ann Intern Med*, 174: 999-  
577 1003.  
578 <https://doi.org/10.7326/M21-1043>.
- 579
- 580 Leth S, Gunst JD, Mathiasen V, Hansen K, S`ogaard O, `Ostergaard L, Jensen-Fangel S, Storgaard  
581 M, Agergaard J. Persistent symptoms in patients recovering from COVID-19 in Denmark. *Open*  
582 *Forum Infectious Dis* (2021) 8: ofab042). US: Oxford University Press.  
583 <https://doi.org/10.1093/ofid/ofab042>.
- 584
- 585 Li Y, Li H, Zhu S, Xie Y, Wang B, He L, et al. Prognostic value of right ventricular longitudinal  
586 strain in patients with COVID-19. *Cardiovascular Imaging* (2020) 13:2287–2299.  
587 <https://doi.org/10.1016/j.jcmg.2020.04.014>.
- 588 Liang X, Shi L, Wang Y, Xiao W, Duan G, et al. The association of hypertension with the  
589 severity and mortality of COVID-19 patients: evidence based on adjusted effect estimates. *J.*  
590 *Infect.* (2020) 81: e44–e47. DOI: <https://doi.org/10.1016/j.jinf.2020.06.060>.
- 591 Long W, Yang J, Li Z, Li J, Chen S, Chen D, Wang S, Li Q, Hu D, Huang J, Zeng W. Abnormal  
592 fibrinogen level as a prognostic Indicator in coronavirus disease patients: a retrospective cohort  
593 study. *Frontiers in Med.* (2021) 8:687220. doi: 10.3389/fmed.2021.687220.
- 594 Madhur MS, Eljovich F, Alexander MR, Pitzer A, Ishimwe J, et al. Hypertension. Do  
595 inflammation and immunity hold the key to solving this epidemic? *Circ Res* (2021) 128: 908-  
596 933. DOI: 10.1161/CIRCRESAHA.121.318052.
- 597 Mallon PW, Tinago W, Leon AG, McCann K, Kenny G, et al. Dynamic change and clinical  
598 relevance of postinfectious SARS-CoV-2 antibody responses. In: *Open Forum Infectious*  
599 *Diseases* (2021) 8: ofab122. US, Oxford University Press. <https://doi.org/10.1093/ofid/ofab122>.
- 600 Mancía, G., Rea, F., Ludergnani, M., Apolone, G. & Corrao, G. Renin – angiotensin–aldosterone  
601 system blockers and the risk of Covid-19. *N. Engl. J. Med.* (2020) 382: 2431–2440. DOI:  
602 10.1056/NEJMoa2006923.
- 603 Medranda GA, Fazlalizadeh H, Case BC, Yerasi C, Zhang C, et al. 2021. Implications of left  
604 ventricular function on short-term outcomes in COVID-19 patients with myocardial



- 605 injury. *Cardiovascular Revascularization Med* (2021) 29: 45-49.  
606 <https://doi.org/10.1016/j.carrev.2021.03.028>.
- 607 Mineo G, Ciccamese F, Modolon C, Landini MP, Valentino M, Zompatori M. Post-ARDS  
608 pulmonary fibrosis in patients with H1N1 pneumonia: role of follow-up CT. *Radiol Med*  
609 (*Torino*) (2012) 117:185–200. <https://doi.org/10.1007/s11547-011-0740-3>.
- 610 Mohammad M, Emin M, Bhutta A, Gul EH, Voorhees E, Afzal MR. Cardiac arrhythmias  
611 associated with COVID-19 infection: state of the art review. *Expert Rev Cardiovascular Therapy*  
612 (2021), 19: 881-889. <https://doi.org/10.1080/14779072.2021.1997589>.
- 613 Murray KO, Garcia MN, Yan C, Gorchakov R. Persistence of detectable immunoglobulin M  
614 antibodies up to 8 years after infection with West Nile virus. *American J Tropical Med Hygiene*  
615 (2013) 89:996. doi: 10.4269/ajtmh.13-0232.
- 616 Naik, P.K., Moore, B.B. Viral infection and aging as cofactors for the development of pulmonary  
617 fibrosis. *Expert Rev Respiratory Med* (2010) 4: 759-771. <https://doi.org/10.1586/ers.10.73>.
- 618 Nalysnyk L, Hernandez-Medina M, Krishnarajah G. Glycaemic variability and complications in  
619 patients with diabetes mellitus: evidence from a systematic review of the literature. *Diabetes*  
620 *Obes Metab* (2010) 12:288-298. <https://doi.org/10.1111/j.1463-1326.2009.01160.x>.
- 621 Nasserie T, Hittle M, Goodman SN. Assessment of the frequency and variety of persistent  
622 symptoms among patients with COVID-19: a systematic review. *JAMA network open*.  
623 2021;4(5): e2111417. doi: <http://dx.doi.org/10.1001/jamanetworkopen.2021.11417>.
- 624 Nehme M, Braillard O, Alcoba G, Aebischer Perone S, Courvoisier D, Chappuis F. COVID-19  
625 symptoms: longitudinal evolution and persistence in outpatient settings. *Ann Intern Med*.  
626 (2021)174(5):723-5. doi: <http://dx.doi.org/10.7326/M20-5926>.
- 627 Navarro AO, Cervantes-Bojalil J, Quevedo ODJC, Martínez AA, Hernández-Jiménez CA, et al.  
628 Decreased quality of life and spirometric alterations even after mild-moderate COVID-19. *Respir*  
629 *Med*. (2021) 181:106391. <https://doi.org/10.1016/j.rmed.2021.106391>.
- 630 Pranata R, Lim MA, Huang I, Raharjo SB, Lukito AA. Hypertension is associated with increased  
631 mortality and severity of disease in COVID-19 pneumonia: a systematic review, meta-analysis  
632 and meta-regression. *J Renin-Angiotensin-Aldosterone System: JRAAS* (2020) 21:  
633 1470320320926899.
- 634 Raafs AG, Verdonschot JA, Henkens MT, Adriaans BP, Wang P et al. The combination of  
635 carboxy-terminal propeptide of procollagen type I blood levels and late gadolinium  
636 enhancement at cardiac magnetic resonance provides additional prognostic information in  
637 idiopathic dilated cardiomyopathy—A multilevel assessment of myocardial fibrosis in dilated  
638 cardiomyopathy. *European J Heart Failure* (2021) 23:933-44. <https://doi.org/10.1002/ehhf.2201>.
- 639 Raman B, Bluemke DA, Lüscher TF, Neubauer S. Long COVID: post-acute sequelae of  
640 COVID-19 with a cardiovascular focus. *European Heart J*. (2022) 43:1157-1172.  
641 <https://doi.org/10.1093/eurheartj/ehac031>.
- 642 Roehrig JT, Nash D, Maldin B, Labowitz A, Martin DA, Lanciotti RS, Campbell GL.  
643 Persistence of virus-reactive serum immunoglobulin M antibody in confirmed West Nile virus  
644 encephalitis cases. *Emerging Infectious Dis*. (2003) 9:376. doi: 10.3201/eid0903.020531.

- 645 Sandler M. Is the lung a ‘target organ’ in diabetes mellitus? *Arch Intern Med* (1990) 150: 1385-  
646 1388. doi:10.1001/archinte.1990.00390190051006.
- 647 Satterfield BA, Bhatt DL, Gersh BJ. Cardiac involvement in the long-term applications of  
648 COVID-19. *Nature Rev Cardiology* (2022) 19: 332-341. [https://doi.org/10.1038/s41569-021-](https://doi.org/10.1038/s41569-021-00631-3)  
649 00631-3.
- 650 Štěpánek L, Janošíková M, Štěpánek L, Nakládalová M, Boriková A. The kinetics and predictors  
651 of anti-SARS-CoV-2 antibodies up to 8 months after symptomatic COVID-19: A Czech  
652 cross-sectional study. *J Medical Virol* (2022) Epub Apr 14. <https://doi.org/10.1002/jmv.27784>.
- 653 Shah W, Hillman T, Playford ED, et al. Managing the long-term effects of Covid-19: summary  
654 of NICE, SIGN, and RCGP rapid guideline. *BMJ* (2021) 372: n136.  
655 doi: <https://doi.org/10.1136/bmj.n136>.
- 656 Shi H, Han X, Jiang N, Cao Y, Alwalid O, et al. Radiological findings from 81 patients with  
657 COVID-19 pneumonia in Wuhan, China: a descriptive study. *Lancet Infectious Dis.* (2020)  
658 20:425-34. [https://doi.org/10.1016/S1473-3099\(20\)30086-4](https://doi.org/10.1016/S1473-3099(20)30086-4).
- 659 Shieh W-JBD, Blau DM, Denison AM, et al. 2009 pandemic influenza A (H1N1): pathology and  
660 pathogenesis of 100 fatal cases in the United States. *Am J Pathol* (2010) 177:166–175.  
661 <https://doi.org/10.2353/ajpath.2010.100115>.
- 662 Singh AK, Singh R. Hyperglycemia without diabetes and new-onset diabetes are both associated  
663 with poorer outcomes in COVID-19. *Diabetes Res. Clinical Practice* (2020) 167:108382.  
664 <https://doi.org/10.1016/j.diabres.2020.108382>.
- 665 Solomon JJ, Heyman B, Ko JP, Condos R, Lynch DA. CT of post-acute lung complications of  
666 COVID-19. *Radiology* (2021) 2021: 211396. doi: 10.1148/radiol.2021211396.
- 667 Suthahar N, Meijers WC, Silljé HH, de Boer RA. From inflammation to fibrosis—molecular and  
668 cellular mechanisms of myocardial tissue remodelling and perspectives on differential treatment  
669 opportunities. *Current Heart Failure Reports* (2017) 14:235-250.  
670 <https://doi.org/10.1007/s11897-017-0343-y>.
- 671 Tang Y, Liu J, Zhang D, Xu Z, Ji J, Wen C. Cytokine storm in COVID-19: the current evidence  
672 and treatment strategies. *Front Immunol* (2020) 11: 1708. doi: 10.3389/fimmu.2020.01708.
- 673 Tartari CJ, Milani G, Salvetti F, Marchetti M, Russo L, Vignoli A, Vitali M, Schieppati F,  
674 Ravasio G, Castellani L, Sanga E. Post-Covid-19 hemostatic characteristics of convalescent  
675 patients: The Bergamo Experience. *Blood* (2021)138(Suppl. 1):1054.  
676 <https://doi.org/10.1182/blood-2021-153611>.
- 677 Trump S, Lukassen S, Anker MS, Chua RL, Liebig J. et al. 2021. Hypertension delays viral  
678 clearance and exacerbates airway hyperinflammation in patients with COVID-19. *Nature*  
679 *Biotechnol.* (2021) 39:705-716. <https://doi.org/10.1038/s41587-020-00796-1>.
- 680 Tudoran C, Tudoran M, Cut TG, Lazureanu VE, Oancea C, et al. Evolution of echocardiographic  
681 abnormalities identified in previously healthy individuals recovering from COVID-19. *J*  
682 *Personalized Med* (2022) 12:46. <https://doi.org/10.3390/jpm12010046>.

- 683 Vojdani A, Monro J, Lanzisera F, Sadeghi H. Serological cross-reactivity between viruses and  
684 their contribution to autoimmunity. *Autoimmunity Rev.* (2021) 7:102840.  
685 DOI: 10.1016/j.autrev.2021.102840.
- 686 Wang JY, Chang SY, Huang YW, Chang SC. Serology-positive but minimally symptomatic  
687 COVID-19 may still cause lung injury and lung function impairment. *Int J Tuberc Lung Dis.*  
688 (2020) 24:568-569. doi: 10.5588/ijtld.20.0197.
- 689 Wu Q, Zhong L, Li H, Guo J, Li Y, Hou X, et al. A follow-up study of lung function and chest  
690 computed tomography at 6 months after discharge in patients with coronavirus disease 2019.  
691 *Can Respir J.* (2021) 2021:6692409. <https://doi.org/10.1155/2021/6692409>.
- 692 Yang JK, Feng Y, Yuan MY, Yuan SY, Fu HJ, et al. Plasma glucose levels and diabetes are  
693 independent predictors for mortality and morbidity in patients with SARS. *Diabetic Med.* (2006)  
694 23:623-8. <https://doi.org/10.1111/j.1464-5491.2006.01861.x>.
- 695 Yang J, Xue Q, Miao L, Cai L. Pulmonary fibrosis: a possible diabetic complication.  
696 *Diabetes/Metabolism Research and Rev.* (2011) 27:311-317. <https://doi.org/10.1002/dmrr.1175>.
- 697 Young SJ. Long-COVID or post-COVID-19 syndrome: putative pathophysiology, risk factors  
698 and treatments. *Infect Dis.* (2021) 53: 737-754. <https://doi.org/10.1080/23744235.2021.1924397>.
- 699 Zhang P, Li J, Liu H, Han N, Ju J, et al. Correction: Long-term bone and lung consequences  
700 associated with hospital-acquired severe acute respiratory syndrome: A 15-year follow-up from a  
701 prospective cohort study. *Bone Res.* (2020) 8: 1-8. <https://doi.org/10.1038/s41413-020-0084-5>.
- 702 Zhao Y-M, Shang Y-M, Song W-B, et al. Follow-up study of the pulmonary function and related  
703 physiological characteristics of COVID-19 survivors three months after recovery.  
704 *EClinicalMedicine* (2020) 25:100463. <https://doi.org/10.1016/j.eclinm.2020.100463>.
- 705 Zhou M, Wong C, Un K, Lau Y, Lee J, Tam F, et al. Cardiovascular sequelae in uncomplicated  
706 COVID-19 survivors. *PLoS ONE* (2021) 16: e0246732. doi:10.1371/journal.pone.0246732.  
707

## 708 **Acknowledgements**

709 This research has been funded by the Science Committee of the Ministry of Education and  
710 Science of the Republic of Kazakhstan (Grant No. BR10965164). <https://www.ncste.kz/en/main>.  
711 The funders had no role in study design, data collection and analysis, decision to publish, or  
712 preparation of the manuscript.

## 713 **Authors' contributions**

714 AT, ZK, BA, NK, MB - Conceptualization, Investigation, Methodology, Supervision, Writing –  
715 review & editing, AS, SK - Data curation, project administration. ZS, PL – Methodology,  
716 Statistical analysis. NSB – Supervision, Analysis, Writing a draft. All authors read and edit a  
717 final draft. All authors contributed to the article and approved the submitted version.

## 718 **Competing interests**

719 The authors declare no competing financial interests.

## 720 **Data Availability Statement**

721 There is a risk of identification of sensitive data of individual patients due to small subgroups;  
722 therefore, the data are not openly accessible on request.

723

724

725

## 726 **Abbreviations**

727 BMI – body mass index; CAD – coronary artery disease; COPD – chronic obstructive pulmonary  
728 disease; CRP – C-reactive protein; CMV – cytomegalovirus; CT – computer tomography; DBP –  
729 low diastolic blood pressure; DD – D-dimer; Fbg – fibrinogen; GI disorders – gastrointestinal  
730 disorders; HbA1c - glycohemoglobin A1c; LV - Left ventricular; 6MWT – six minute test; NT-  
731 proBNP - ventricular natriuretic peptide; RBBB – right bundle branch block; SA – sinoatrial;  
732 SBP – systolic blood pressure  
733

## 734 **Legends to Tables**

735 **Table 1.** Clinical characteristic and comorbidities in participants after COVID-19 infection.

736 **Table 2.** Participants-reported clinical manifestations persistent after COVID-19 infection at  
737 median of 6 months follow-up.

738 **Table 3.** Cardiac abnormalities detected in cardiac assessment of post-COVID-19 patients.

739 **Table 4.** Laboratory results of blood sample in participants after COVID-19 infection with  
740 median follow-up of 6 months.

741

## 742 **Legends to the Figures**

743 **Figure 1.** Study flow diagram.

744 **Figure 2.** Clinical characteristics and laboratory results of blood samples in post-COVID-19  
745 patients with and without type 2 diabetes: age, D-dimers (DD), ventricular natriuretic peptide  
746 (NT-proBNP), C-reactive protein (CRP), body mass index (BMI), neutrophils, fasting glucose  
747 and glycated hemoglobin (HbA1c) (\* $p < 0.05$ , \*\* $p < 0.01$ , \*\*\* $p < 0.001$ , \*\*\*\* $p < 0.0001$ ).

748 **Figure 3.** Clinical characteristics and laboratory results of blood samples in post-COVID-19  
749 patients with and without hypertension: age, BMI, NT-pro BNP, CRP, neutrophils, white blood

750 cells (WBC), DD, fasting glucose, HbA1c, HGB, fibrinogen and ferritin ( $*p < 0.05$ ,  $**p < 0.01$ ,  
751  $****p < 0.0001$ ).

752 **Figure 4.** Clinical characteristics and laboratory results of blood samples in post-COVID-19  
753 patients with no comorbidities (green), Hypertension only (blue), type 2 diabetes mellitus only  
754 (orange) and both hypertension and type 2 diabetes mellitus (red): age, BMI, NT-proBNP, CRP,  
755 neutrophils, WBC, DD, fasting glucose, HbA1c, HGB, fibrinogen and ferritin ( $**p < 0.01$ ,  $***p$   
756  $< 0.001$ ,  $****p < 0.0001$ ).

757 **Figure 5.** Fibrotic changes in CT scan of post-COVID-19 patients with Hypertension (**A**).  
758 Cardiac abnormalities in post-COVID-19 patients with and without hypertension (**B**); with and  
759 without type 2 (**C**). ( $*p < 0.05$ ,  $***p < 0.001$ ,  $****p < 0.0001$ ).

760

## 761 **Supplemental Data**

762 **Appendix 1.** Results of a questionnaire with items on demographic information, current  
763 complaints, comorbidities, and medications.

764 **Appendix 2.** Results of a Chalder Fatigue Scale (CFS) questionnaire.

765 **Appendix 3.** CT abnormalities.
